# Supplementary material for: SHP2 deneddylation mediates tumor immunosuppression in colon cancer via the CD47/SIRPα axis
Source: PubMed Central journal article supplement (PMC9927946; doi:10.1172/jci162870), 2023-02-15
Supplement: jci-133-162870-s194.pdf [file jci-133-162870-s194.pdf]

1123 **Supplemental Materials for**

1124 SHP2 deneddylation mediates tumor immunosuppression in colon cancer *via* the  
1125 CD47/SIRP $\alpha$  axis

1126 Yiqing Li<sup>1</sup>, Hui Zhou<sup>1</sup>, Pan Liu<sup>1</sup>, Dandan Lv<sup>2</sup>, Yichun Shi<sup>1</sup>, Bufu Tang<sup>3</sup>, Jiaqi Xu<sup>4</sup>,  
1127 Tingting Zhong<sup>4</sup>, Wangting Xu<sup>5</sup>, Jie Zhang<sup>6</sup>, Jianying Zhou<sup>5</sup>, Kejing Ying<sup>2</sup>, Yongchao  
1128 Zhao<sup>7</sup>, Yi Sun<sup>7</sup>, Zhinong Jiang<sup>4</sup>, Hongqiang Cheng<sup>8</sup>, Xue Zhang<sup>1\*</sup>, Yuehai Ke<sup>1\*</sup>

1129 \*Correspondence to: [yke@zju.edu.cn](mailto:yke@zju.edu.cn) or [zhangxue@zju.edu.cn](mailto:zhangxue@zju.edu.cn).

1130 This PDF file includes:

1131 Supplemental Methods

1132 Supplemental Figures 1 to 7

1133 Supplemental Tables 1 to 4

1134

1135

1136

1137

1138

1139

1140

1141

1142

1143

1144

1145 **Supplemental Methods**

1146 **Reagents**

1147 The information on all the reagents used in this article was listed in the Supplemental  
1148 Table 1.

1149 **Expression vectors**

1150 To construct SIRP $\alpha$ , SHP2, NSH2, CSH2, PTP, 2SH2, SHP1, NEDD8, SENP8,  
1151 UBE2M, UBE2F, Cbl-c, c-Cbl, MDM2, TRIM4, XIAP, RBX1, CD11b, CD18, LAMP1,  
1152 PDL1, the corresponding human full-length sequences were cloned and inserted into  
1153 the PXJ40 expression vectors.

1154 NEDD8 K11R, NEDD8 K48R, SHP2 K358R, SHP2 K364R, SHP2 K358R/ K364R,  
1155 SHP2 D61G, SHP2 A72G, SHP2 E76K, SHP2 E139D, SHP2 N308D, SIRP $\alpha$   
1156 4YF(Y429F/Y452F/Y470F/Y476F), and SHP2 R32A/R138A PXJ40 vectors were  
1157 produced by base mutation in cDNA encoding sequences.

1158 To produce SRC, XIAP, SHP2 WT, SHP2 D61G, SHP2 E76K, SHP2 K358R/ K364R,  
1159 and SHP2 K364R recombinant protein, the corresponding human sequences were  
1160 cloned and inserted into the Pcold-GST plasmids. All constructs were verified by  
1161 sequencing.

1162 **Analysis of public scRNA-seq datasets**

1163 ScRNA-seq data of tumor-infiltrating myeloid cells from different human tumors were  
1164 acquired accompanying cluster annotations, they were downloaded from the Gene  
1165 Expression Omnibus (GEO) with accession codes GSE46771 and GSE154763.  
1166 Harmony algorithm is used for performing integration of single-cell genomics datasets,

1167 and variable genes across monocyte and macrophage clusters were computed.  
1168 ScRNA-seq data from tumor single-cell suspensions between MMRd and MMRp  
1169 subtypes in colorectal cancer patients were downloaded from GEO with accession code  
1170 GSE178241. Firstly, the processed data from the database was extracted. Seurat 3.1 was  
1171 used for quality control and expression level normalization and normalization and  
1172 clustering of cells. Macrophage populations were extracted for further analysis. After  
1173 TSNE dimensionality reduction, GO was used for gene differential enrichment analysis.  
1174 The differential genes were  $\log_{2}(\text{fold change}) \geq 0.25$ , and the top 100 genes with  
1175 differential values were used for GO analysis. GO entries take the top 10 visualizations.  
1176 ScRNA-seq data from tumor-infiltrating myeloid cells from patients with MSS  
1177 colorectal cancer receiving NAC were downloaded from the author's website  
1178 <http://www.cancerdiversity.asia/scCRLM>. The data are reproduced according to the  
1179 standards of the article.

#### 1180 **Flow sorting of TIMs**

1181 The tumor was minced and digested in DMEM containing 300 units /mL collagenase  
1182 IV (Worthington) and 50 U/ml DNase I (Sigma) at 37°C for 1 h. Red blood cells are  
1183 removed by ACK Lysing Buffer. The cell mixtures were then filtered through 75 mm  
1184 cell strainers. All the TIMs were isolated by flow sorting. The panel contains CD45-  
1185 APC, CD68-FITC, and live/dead stains.

#### 1186 **Organoids**

1187 Patient-derived tumor organoids were cultured by air-liquid interface methods. Human  
1188 tissues from resected tumors were minced finely on ice, washed twice in ADMEM/F12

1189 (Gibco), resuspended in 1mL of a mixture of Type I collagen gel (Trevigen) containing  
1190 10X Ham's F12 (Thermo) and reconstitution buffer (2.2 g NaHCO<sub>3</sub> in 100 ml, 0.05 N  
1191 NaOH, 200 mM HEPES) in a ratio of 8:1:1, respectively. Next, the fragment-collagen  
1192 solution was added on top of a 0.4 µm transwell insert (PICM03050, Millicell-CM,  
1193 Millipore), which was previously coated with 1 ml of the mentioned solution, The  
1194 transwell containing tumor tissue and collagen was placed into an outer 60 mm cell  
1195 culture dish containing 1.0 mL of ADMEM/F12 supplemented with 50% Wnt3a, R-  
1196 spondin1 conditioned medium as well as HEPES (Gibco), Glutamax (Gibco),  
1197 Nicotinamide (Sigma), N-Acetylcysteine (Sigma), B-27 without vitamin A (Gibco),  
1198 A83-01 (Tocris), Penicillin-Streptomycin (Gibco), Gastrin (Tocris), SB-202190  
1199 (Sigma), hIL-2 (Novoprotein) and EGF (Novoprotein). Organoids were passaged by  
1200 dissociation with 300 units /ml collagenase IV (Worthington) at 37°C for 30 min and  
1201 replated at the desired density.

#### 1202 ***In vitro* neddylation assay**

1203 Human XIAP, SHP2 WT, SHP2 D61G, SHP2 Y62D, SHP2 E76K, SHP2 K358R/  
1204 K364R, and SHP2 K364R were purified in-house. Relative recombinant proteins were  
1205 incubated with components of the NEDD8 Conjugation Initiation Kit (Boston Biochem)  
1206 for 1h at 37°C. Samples were separated on SDS-PAGE and analyzed by  
1207 immunoblotting.

#### 1208 **Recombinant protein purification**

1209 GST-tagged fusion proteins were purified from BL21 cells. Cells were grown in  
1210 constant shaking (220 rpm) at 37°C until the log phase, then induced with 0.1 mM IPTG

1211 at 16°C for 12 h. Cells were harvested, resuspended in lysis buffer (20 mM Tris-HCL  
1212 PH 7.5, 300 mM NaCl, 1% Triton X-100, and Protease Inhibitor Cocktail), and  
1213 sonicated. Cell debris was removed by centrifugation and supernatant was incubated  
1214 with glutathione-sepharose overnight at 4°C. The bound proteins were cleaved with  
1215 HRV 3C protease for the fusion tag.

#### 1216 **SHP2 full length and PTP domain enzyme activity**

1217 The catalytic activity of neddylated SHP2 or PTP was monitored using the surrogate  
1218 substrate DiFMUP. Overexpressed Myc-SHP2 or Myc-PTP Cells were lysed in Co-IP  
1219 lysis buffer without phosphatase inhibitor and incubated with Myc antibody-conjugated  
1220 magnetic beads. Beads were finally kept in assay buffer (60mM HEPES, pH 7.2, 75mM  
1221 NaCl, 75mM KCl, 1mM EDTA, 0.05% P-20, 5mM DTT). SHP2 bonded beads need  
1222 extra incubation with 1µM 2P-IRS-1 (H2N-LN (pY) IDLDLV (dPEG8) LST (pY)  
1223 ASINFQK-amide) for 30 min incubation at 25 °C. Then, substrate DiFMUP was added  
1224 and reacted at 25 °C for 30min. The reaction was then quenched, and the fluorescence  
1225 signal was monitored using excitation and emission wavelengths of 340 nm and 450  
1226 nm on a microplate reader (M5, Molecular Devices).

#### 1227 **Immunofluorescence staining and confocal microscopy**

1228 For immunofluorescence staining, cells were fixed in 4% PFA (pH7.0) and  
1229 permeabilized with 0.5% Triton X-100 before blocking with 4% goat serum. Samples  
1230 were incubated with primary antibody followed by secondary antibody incubation and  
1231 then mounted in an antifade mounting medium with DAPI. The samples were imaged  
1232 using an Olympus IX83-FV3000 confocal microscope (Olympus).

1233 **Total internal reflection fluorescence microscopy**

1234 TIRF microscopy was conducted on a Nikon N-STORM & A1 Cell TIRF system with  
1235 a DU897 EMCCD 100Xoil TIRF objective and the fluorescence image were collected  
1236 with Nis-Elements software (Nikon). BMDMs and MEFs were removed from their  
1237 culture dish using 5% EDTA in PBS, washed, and resuspended in the HEPES imaging  
1238 buffer (20 mM HEPES, 135 mM NaCl, 4 mM KCl, 10 mM glucose, 0.1 mM CaCl<sub>2</sub>, 0.1  
1239 mM MgCl<sub>2</sub>) before being added to the coated TIRF chamber. After 30 min interaction  
1240 with specific coating ligands, BMDMs were stained for analysis, MEFs need 1h  
1241 interacting. For live-cell imaging, BMDMs were labeled with Wheat Germ Agglutinin  
1242 (Thermo) and Alexa Fluor-488 Phospho-Tyrosine antibody (CST) before being added  
1243 to the coated TIRF chamber. Cells were imaged on a heated stage and supplemented  
1244 with warmed (37°C) humidified air. Timeseries images were analyzed with ImageJ  
1245 software.

1246 **Stochastic optical reconstruction microscopy (STORM) image acquisition**

1247 STORM microscopy was conducted on a Nikon N-STORM & A1 Cell TIRF system  
1248 with a DU897 EMCCD 100Xoil TIRF objective and the fluorescence image was  
1249 collected with a Nikon N-STORM super-resolution system (Nikon Instruments Inc.)  
1250 Besides required channels, a 405 nm laser was used to increase the number of on-state  
1251 fluorophores according to generally recommended. Cells were stained and then  
1252 immersed in STORM imaging buffer, and Nikon microscopic imaging device provided  
1253 a Perfect Focus System (PFS) to achieve real-time correction of focus drift in the Z-  
1254 axis direction. For live MEF imaging, MEFs were treated with SHP099 for 4h and then

1255 labeled with Wheat Germ Agglutinin (Thermo) before being added to the ICAM-1  
1256 coated TIRF chamber. Cells were imaged on a heated stage and supplemented with  
1257 warmed (37°C) humidified air.

1258 STORM imaging buffer was freshly prepared before data acquisition, which contained  
1259 7 µl of oxygen-scavenging GLOX buffer (14 mg of glucose oxidase, 50 µl of 17 mg/mL  
1260 catalase in 200 µl of 10 mM Tris, 50 mM NaCl, pH 8.0), 70 µl of MEA buffer (77 mg  
1261 MEA in 1.0 mL 0.25N HCl) and 620µl of Buffer B (50 mM Tris-HCl (pH8.0) + 10 mM  
1262 NaCl + 10% Glucose). For live-cell STORM imaging, it's 7 µl of oxygen-scavenging  
1263 GLOX buffer, 3.5µl of BME, and 690µl phenol red-free media growth medium with 75  
1264 mM HEPES.

1265 **Förster resonance energy transfer, fluorescence resonance energy transfer (FRET)**

1266 FRET-based SHP2 biosensor (Addgene) was transfected in control and SENP8 KO  
1267 HEK293T cells. After 48 h of transfection, the cells were hungered and stimulated with  
1268 EGF (10ng/ml) or not and fixed by 4% PFA. Acceptor photobleaching FRET was  
1269 performed using the FV1000 confocal microscope (Olympus). The ECFP and Ypet  
1270 fluorophores were excited with excitation wavelengths of 405 and 514 nm, respectively.  
1271 After acquiring the emission images, the cells were marked by a region of interest, and  
1272 this region was bleached by a high laser power (20 iterations, 100% laser power, 514  
1273 nm). The FRET efficiency was measured as the percentage increase of donor after  
1274 photobleaching the acceptor:  $\text{FRET/ECFP ratio} = 100\% \times (\text{ECFP}_{\text{post}} - \text{ECFP}_{\text{pre}}) / \text{ECFP}_{\text{post}}$ . Spectral FRET was performed using the FV3000 confocal  
1275 microscope (Olympus). The spectrum was measured from 450 nm to 580 nm in 10 nm  
1276

1277 increments with excitation from 405 nm. The maximum fluorescence emission intensity  
1278 of ECFP and Ypet fluorophores was 460nm and 520 nm. FRET ratio = 100%  
1279  $\times$ fluorescence Spectra  $\lambda_{520}$  / fluorescence Spectra  $\lambda_{460}$ .

#### 1280 ***In vitro* SHP2 binding and activation assays**

1281 In SHP2 binding assays, beads bounded wild-type or 4YF mutant SIRP $\alpha$  proteins were  
1282 purified from HEK293T and incubated with recombinant SRC in reaction buffer (20  
1283 mM HEPES, pH 7.5, 150 mM NaCl, 10 mM MgCl<sub>2</sub>, 5 mM ATP, and 10 mM BME) at  
1284 37°C for 30 min. Thereafter, these beads with bound proteins were washed five times  
1285 in washing buffer PBS-T (PBS + 0.1% Tween 20). Subsequently, phosphorylated  
1286 SIRP $\alpha$  was incubated with recombinant SHP2 at 37°C for 1 h. The beads were then  
1287 washed 5 times with washing buffer and finally eluted with loading buffer for western  
1288 blot analysis. For SHP2 allosteric inhibition, recombinant SHP2 was incubated with  
1289 SHP099 before binding with SIRP $\alpha$ . In SHP2 activation assays, phosphorylated SIRP $\alpha$   
1290 was incubated with recombinant SHP2 or SHP2 E76K at 37°C for 1 h. Then, substrate  
1291 DiFMUP was added and reacted at 25 °C for 30min. The reaction was then quenched,  
1292 and the fluorescence signal was monitored using excitation and emission wavelengths  
1293 of 340nm and 450nm on a microplate reader (M5, Molecular Devices).

#### 1294 **Fluorescent labeling**

1295 Proteins, as well as antibodies, were labeled using AlexaFluor488 NHS Ester  
1296 (Succinimidyl Ester, Thermo Fisher Scientific) reconstituted in anhydrous DMSO  
1297 (dimethylsulfoxide, Sigma Aldrich). Dye was mixed with protein at a 5X molar ratio  
1298 (dye: protein ratio was 5:1) and incubated at room temperature for 1 h. Excess dye was



1299 removed by purifying protein over NAP-5 columns (GE Healthcare). Labeling was  
1300 confirmed using NanoDrop 2000 (Thermo Fisher).

### 1301 **Bead preparation**

1302  $\sim 8 \times 10^5$  streptavidin beads were washed three times with PBS, mixed within PBS plus  
1303 0.4% BSA, and incubated with biotinylated mouse CD47 or anti-streptavidin IgG at  
1304 room temperature for 0.5 h with end-over-end mixing to allow for protein coupling. For  
1305 the specific purpose, IgG and mouse CD47 were labeled using AlexaFluor488 NHS  
1306 Ester. Beads were then washed 3 times to remove excess protein. Unless otherwise  
1307 indicated, anti-streptavidin mouse IgG (BioLegend) was added at 10 nM as the lowest  
1308 IgG concentration that triggered engulfment. Biotinylated mouse CD47  
1309 (ACROBiosystem) was added at 50 nM for target particle experiments.

### 1310 **Quantification of engulfment by High Content Screening**

1311  $1 \times 10^4$  BMDMs were plated in one well of a 96-well Plate 24h before the experiment.  
1312 To disrupt SHP1 and SHP2 function, inhibitors were added for 4h while  $Mn^{2+}$  mediated  
1313 integrin activation lasted 30min. To disrupt integrin function, the blocking antibodies  
1314 or isotype control were added at 10 mg/mL 30 min before beads as macrophages were  
1315 washed into non-serum culture media before antibody treatment to eliminate any  
1316 potential serum components that may serve as integrin ligands.  $\sim 8 \times 10^5$  beads were  
1317 added to the well and engulfment was allowed to proceed for 30 min. The plate was  
1318 washed 3 times to remove extra beads. Cells were fixed with 4% PFA and stained with  
1319 CellMask (Invitrogen) and DAPI. Images were obtained with the Operetta high-content  
1320 cell imaging analysis system (PerkinElmer). Data were analyzed by images collected

1321 from 10 representative fields in each group. Single cells were identified based on DAPI  
1322 as a reference, while the beads quantification was performed based on the area and  
1323 intensity of the beads channel.

#### 1324 **Subcellular Protein Fractionation Extraction**

1325 CD47 coating beads were added to BMDMs and interaction was allowed to proceed for  
1326 30 min. The BMDMs were washed 3 times to remove extra beads. Then use the  
1327 subcellular Protein Fractionation Kit (Thermo Fisher) according to the manual.

#### 1328 **GTPases activation assay**

1329 BMDMs were lysed and the supernatants were used to carry out a GST precipitation  
1330 assay to detect the GTPases activation. GTP-bound RAP1 was assayed by binding to  
1331 recombinant GST-fused RalGDS. RAP1 activation was normalized to total RAP1.

#### 1332 **Bimolecular fluorescence complementation**

1333 The bimolecular fluorescence complementation (BiFC) system is established by fusing  
1334 two complementary parts of green fluorescent protein (GFP), GFP S1-10 and GFP S11,  
1335 SIRP $\alpha$ GFP S1-10. SHP2 WT and 2KR GFP S11 were transfected into HEK293T cells,  
1336 after 48h, cells were added to CD47 coated chamber and then stained with Na/K ATPase  
1337 antibody (Abcam) to visualize membrane.

#### 1338 **Precipitation with integrin tail related proteins**

1339 BMDMs were washed and treated with 5 mM DTBP (Thermo Fisher Scientific) for 30  
1340 min, and then lysed with TBS lysis buffer (containing 1% Triton X-100, 0.05% NP-40,  
1341 Protease Inhibitor Cocktail, 1 mM CaCl<sub>2</sub>, 1 mM MgCl<sub>2</sub>) for 30 min on ice. The lysates  
1342 were then immunoprecipitated with indicated antibodies. Before western blot,

1343 crosslinks with DTBP need to be cleaved by reducing the disulfide bond of the spacer  
1344 arm with 100mM DTT at 37°C for 30 minutes.

1345 ***In vivo* recover tumor cells assay**

1346 MC38 cells were labeled with Cell Proliferation Dye eFluor450 (Invitrogen) or  
1347 eFluor670(Invitrogen) for 15min at room temperature respectively. Directly after  
1348 labeling, eFluor670 dyed cells were opsonized by isotype control (Bio X Cell) and  
1349 eFluor450 dyed cells by anti-PDL1 antibody (Bio X Cell). Subsequently, *Senp8*<sup>+/+</sup> and  
1350 *Senp8*<sup>+/-</sup> mice were injected intraperitoneally (i.p.) with 1×10<sup>7</sup> cells in 200μl PBS in a  
1351 1:1 mixture. At 24h after injection, mice were euthanized, the peritoneal cavity was  
1352 washed with PBS containing 5mM EDTA, and the absolute recovered number of cells  
1353 was determined by NovoCyte flow cytometry (Agilent).

1354 **Tumor cells phagocytosis and digestion Assay**

1355 BMDMs were plated 8X10<sup>4</sup> per well in a 24-well plate and were transfected with  
1356 SHP2WT, SHP2 K358R/ K364R plasmid, or empty vector. MC38-hPDL1 cells were  
1357 opsonized with a range of anti-hPDL1 antibody (BioLegend) concentrations and  
1358 stained with Cell Proliferation Dye eFluor450 at 37°C for 15 min. Each phagocytosis  
1359 reaction reported in this work was performed by co-culture of 2X10<sup>5</sup> target cells and  
1360 macrophages for 1 h at 37°C. Macrophages were identified by FITC-labeled anti-  
1361 CD11b (BioLegend) as flow cytometry (Agilent) was performed. Phagocytosis was  
1362 calculated as the percentage of eFluor450<sup>+</sup> CD11b<sup>+</sup> cells among CD11b<sup>+</sup> cells. In the  
1363 same way, endogenous PDL1 opsonized MC38 cells were co-cultured with BMDMs  
1364 for phagocytosis reaction, then extra tumor cells were washed out. Tumor cell digestion

1365 lasted 24h, Then BMDMs were detached from the plate and determined by NovoCyte  
1366 flow cytometry (Agilent).

### 1367 **Histology and Immunohistochemistry**

1368 Haematoxylin-eosin (HE) staining and Masson's trichrome stain were performed  
1369 according to established staining protocols of our routine laboratory. For  
1370 immunohistochemistry (IHC) staining, IHC staining of human tissue and organoids was  
1371 performed according to established staining protocols of the routine laboratory, and  
1372 IHC staining of mice tumors was performed with Multi-fluorescent  
1373 Immunohistochemical Staining Kit (Absin) according to the manufacturer's  
1374 instructions.

### 1375 **Tumor cell phagocytosis imaging**

1376 For the 3D image, CSFE (Invitrogen) labeled MC38 cells were opsonized by anti-PDL1  
1377 antibody, and tumor cells were added to Lamp1-mcherry overexpressed BMDMs for 1  
1378 h at 37°C. Then extra tumor cells were washed out and cells were stained with DAPI.  
1379 For live-cell imaging, PDL1 antibody opsonized MC38 cells were stained with Hoechst  
1380 33342 to show nucleus, BMDMs were stained with LysoTracker to show lysosomes,  
1381 and cells were imaged every 0.5 min after 10min co-culture. Cells were imaged on a  
1382 heated stage and supplemented with warmed (37°C) humidified air. Fluorescent images  
1383 were processed and assembled into figures using Fiji. Z-stack was created and rendered  
1384 with Imaris (Bitplane).

### 1385 **ELISA**

1386 Tumor tissues were minced and 50–100 mg tissues were homogenized in NP40

1387 (w:v = 1:5). Tumor homogenates were centrifuged at 12,000g for 30 min, then the  
1388 supernatants were filtered through a 0.22  $\mu$ m filter. Cytokine levels in tissue  
1389 homogenates were measured by the mouse ELISA kit (Invitrogen) according to the  
1390 manufacturer's instructions. In the same way, human blood plasma was utilized to  
1391 detect human CEA. Absorbance at 450 nm was measured on a microplate reader (M5,  
1392 Molecular Devices).

### 1393 **Deneddyltion assay**

1394 For the deneddyltion assay in macrophage extracts, the fluorogenic substrate, NEDD8-  
1395 7-amino-4-methylcoumarin (R&D Systems) was used according to the instructions  
1396 provided by the manufacturer. For tumor cell and macrophage interaction, MC38 cells  
1397 were pre-incubated with pep-20-D12 (awsATWSNYwrh, lowercase letters in the  
1398 sequence mean D-configuration amino acids) for CD47/SIRP $\alpha$  blockage, before adding  
1399 to macrophages for co-culture for 30min at 37°C. Macrophages were sorted out by  
1400 CD68 conjugated beads and then lysed in RIPA buffer with normalized protein  
1401 concentration. For ALI-PDOs, organoid cultures were established as above and  
1402 supplemented with 10 $\mu$ g/ml anti-CD47(BIO x cell) antibody or control for 7 days, then  
1403 dissociated in collagenase IV. The single-cell suspension is derived from 0.05%  
1404 trypsin/EDTA digestion for 5 min at 37 °C. Infiltrating macrophages were sorted out by  
1405 CD68 conjugated beads, lysed in RIPA buffer and protein concentration was normalized.  
1406 In the same way, to analyze the deneddyltion activity of human peripheral blood  
1407 leukocytes, cells were lysed in RIPA buffer and protein concentration was normalized.

### 1408 **Molecular docking and molecular dynamics**

1409 Chemically conjugated docking application from Rosetta program suite version 3.4 was  
1410 used to dock NEDD8 to SHP2. Cryo-EM structure models of SHP2 (PDB ID 5ehr)  
1411 were first relaxed by using the Relax ScriptManager application and models with the  
1412 lowest energy scores were chosen for Chemically conjugated docking of NEDD8.  
1413 There are two important novel chunks of code associated with this algorithm. The C-  
1414 terminus of NEDD8 (glycine) is chemically linked to K364 of SHP2, resulting in an  
1415 isopeptide bond between the proteins. It is this bond that this protocol remodels. Phil  
1416 Bradley deserves credit for helping set up this chemical conjugation code. The  
1417 remodeling algorithm is straightforward. It uses Rosetta's standard Metropolis/Monte  
1418 Carlo random sampling tools. A series of possible Pose modifications are chosen from  
1419 each Monte Carlo cycle. These include effective psi and phi angles of NEDD8's  
1420 terminal glycine. These are treated directly by TorsionDOFMover instead of more  
1421 familiar sidechain/backbone movers because the extra chemical bond changes the  
1422 torsional preferences at these bonds, meaning that the Ramachandran and Dunbrack  
1423 libraries do not apply. TorsionDOFMover internally checks against a molecular-  
1424 mechanics bond torsion term (although this term is not in the broader score function).  
1425 Other possible Monte Carlo moves include standard Small/Shear moves on the  
1426 penultimate NEDD8 residues (the number of mobile residues is command-line flagged),  
1427 and also KIC loop modeling. After a random move, the pose runs through Rotamer  
1428 Trials (to quickly pack sidechains) and a minimization step before the Metropolis  
1429 criterion is applied. Some fraction of MC cycles instead performs a full repack of the  
1430 interface. All the molecular graphics were rendered by the UCSF Chimera<sup>57</sup> software

1431 version. Molecular dynamics (MD) simulations were conducted by GROMACS.

### 1432 **Microscale thermophoresis**

1433 The interaction between 2P-IRS-1 and NEDD8-SHP2 conjugation was measured using  
1434 the Monolith NT.115 MST instrument (Nanotemper Technologies). 2P-IRS-1 were  
1435 fluorescently labeled with Cy5. The NEDD8-SHP2 conjugation conducted from *in vitro*  
1436 neddylation assay was purified by Superdex 75 gel filtration column (GE Healthcare)  
1437 and the purities were determined by SDS-PAGE. A solution of unlabeled protein was  
1438 serially diluted in the presence of 100 nM labeled 2P-IRS-1. The samples were loaded  
1439 into capillaries (Nanotemper Technologies). Measurements were performed at 25 °C,  
1440 Data analyses were performed using Nanotemper Analysis software.

### 1441 **Real-time PCR**

1442 Total RNA of human peripheral blood leukocytes was extracted by Trizol and then  
1443 reverse-transcribed into cDNA using ReverTraAce qPCR RT kit (Toyobo). Real-time  
1444 PCR was conducted using an SYBR Green reagent (CW BIO) on CFX96 Touch Real-  
1445 Time PCR Detection System (Bio-Rad). Primer sequences are listed in the  
1446 Supplemental Table 1.

### 1447 **RNA sequencing**

1448 A total amount of 4 µg RNA/sample was used for the RNA sample preparations.  
1449 Sequencing libraries were generated using the NEBNext® Ultra™ RNA Library Prep  
1450 Kit for Illumina® (NEB, USA) and index codes were added to attribute sequences to  
1451 each sample. Library preparation, clustering and sequencing were done by Novogene  
1452 Experimental Department (Novogene). The GEO number of RNA-seq is GSE199585.

1453 **Mass spectrometry**

1454 HEK293T lysates were separated on SDS-PAGE and followed by in-gel digestion,  
1455 desalted, and then analyzed with the assistance of PTM-Biolabs Inc. Data analysis was  
1456 carried out with Maxquant (v1.6.8.0).

1457 **Proximity ligation assay**

1458 Duolink® Proximity Ligation Assay (Sigma-Aldrich) was conducted according to the  
1459 manual. PLA technology uses a pair of monoclonal or polyclonal antibody probes  
1460 labeled with an oligodeoxynucleotide (single-stranded DNA). When the two probes  
1461 recognize the same protein, the distance between the two probes is close, resulting in  
1462 the so-called proximity effect (proximity). The fragmented DNA on the PLA probe can  
1463 be joined together to form a new DNA fragment by ligase. The new DNA fragment can  
1464 be amplified and quantified by fluorescent PCR, so as to quantify the corresponding  
1465 target protein.

1466 **Cytometry by Time-Of-Flight (CyTOF)**

1467 The tumor was minced and digested in DMEM containing 300 units /mL collagenase  
1468 IV (Worthington) and 50 U/ml DNase I (Sigma) at 37°C for 1 h. Red blood cells are  
1469 removed by ACK Lysing Buffer. The cell mixtures were then filtered through 75 mm  
1470 cell strainers. For mass cytometry analysis, purified antibodies panel were listed in  
1471 Supplemental Table 4. Antibody labeling with the indicated metal tag was performed  
1472 using the MaxPAR antibody Labelling kit (Fluidigm). Conjugated antibodies were  
1473 titrated for optimal concentration before use. Cells were thawed and washed with PBS  
1474 and then stained with 100µL of 250nM cisplatin (Fluidigm) for 5min on ice to exclude



1475 dead cells, and then incubated in Fc receptor blocking solution before stained with  
1476 surface antibodies cocktail for 30 min on ice. Cells were washed twice with FACS  
1477 buffer (PBS+0.5%BSA) and fixed in 200 $\mu$ L of intercalation solution (Maxpar Fix and  
1478 Perm Buffer containing 250nM 191/193Ir, Fluidigm) overnight. After fixation, cells  
1479 were washed once with FACS buffer and then perm buffer (eBioscience), stained with  
1480 intracellular antibodies cocktail for 30 min on ice. Cells were washed and resuspended  
1481 with deionized water, adding into 20% EQ beads (Fluidigm), acquired on a mass  
1482 cytometer (Helios, Fluidigm). Data analysis was done by PLTTECH Experimental  
1483 Department (PLTTECH). The accession number of FlowRepository is FR-FCM-Z563.

1484

1485

1486

1487

1488

1489

1490

1491

1492

1493

1494

1495

1496

**A**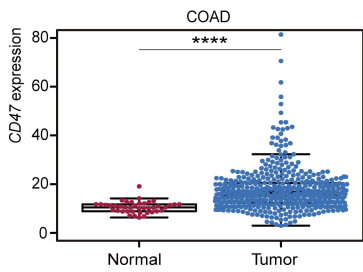**D**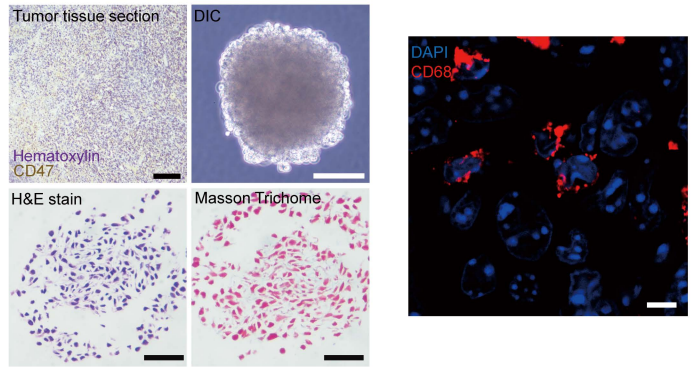**B**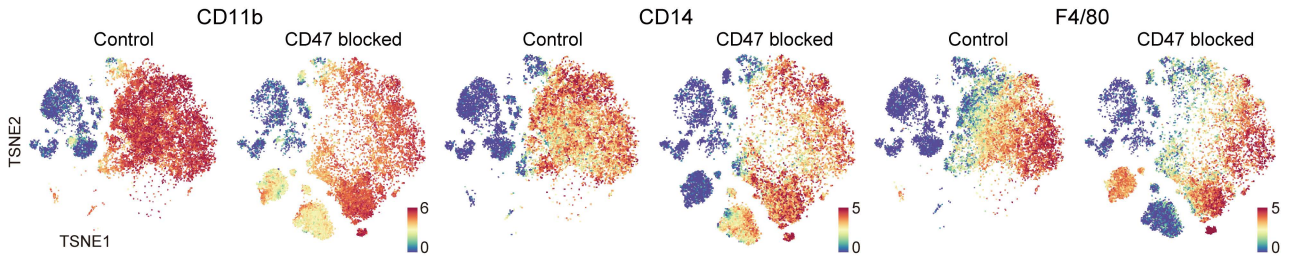**C**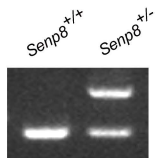**E**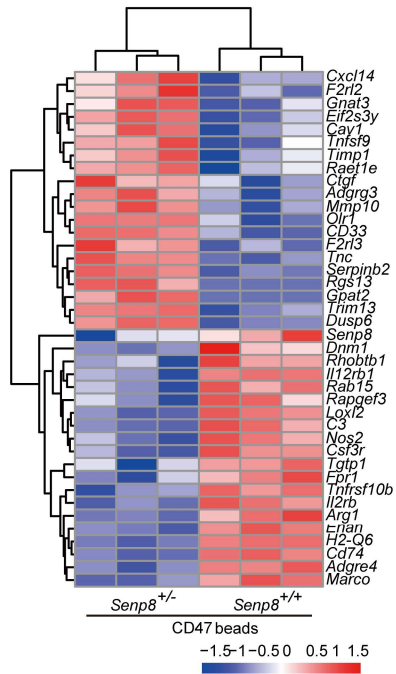**F**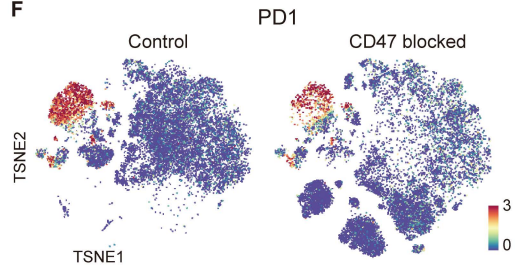

1497 **Supplemental Figure 1. CD47 blockage modulates neddylation of CRC TIMs.**  
1498 (A) The *CD47* expression from TCGA-COAD cohort (n of adjacent normal colon tissue  
1499 samples=41, n of colon adenocarcinoma tissue samples=473). (B) TSNE visualization  
1500 of CD11b, CD14, and F4/80 expression in tumor-infiltrating leukocytes from Figure  
1501 1D groups. (C) Genotyping of *Senp8* heterozygous mice strain. (D) CD47 stain of  
1502 human surgical tumor resections as well as DIC, H&E stain, and Masson's trichrome  
1503 stain of organoids derived from human surgical tumor resections, scale bars, 100µm  
1504 (left). Confocal microscopy visualization of organoid stained with CD68 and DAPI to  
1505 show TIMs, scale bars, 10µm (right). (E) Heatmap of top genes differentially expressed  
1506 in indicated BMDMs (n=3). (F) TSNE visualization of PD1 expression in tumor-  
1507 infiltrating leukocytes from Figure 1D groups. Data are expressed as mean ± SD;  
1508 Wilcoxon test (A); non-significant (ns),  $p > 0.05$ ; \*  $p < 0.05$ ; \*\*  $p < 0.01$ ; \*\*\*  $p < 0.001$ ; \*  
1509 \*\*\*  $p < 0.0001$ .

1510

1511

1512

1513

1514

1515

1516

1517

1518

**A**

Calculating PSSM for sp|Q06124|PTN11\_HUMAN  
# NeddylPreddy (v0.3) - Prediction Results

| Identifier            | Residue | Class      |
|-----------------------|---------|------------|
| sp Q06124 PTN11_HUMAN | 55      | Neddylated |
| sp Q06124 PTN11_HUMAN | 358     | Neddylated |
| sp Q06124 PTN11_HUMAN | 534     | Neddylated |
| sp Q06124 PTN11_HUMAN | 536     | Neddylated |

**B** UBE2M peptide: VGQGYPHDPPK

FIMS, HCD, z=+2, Mono m/z=597.80467 Da, MH+=1194.60206 Da, Match Tol.=0.02 Da

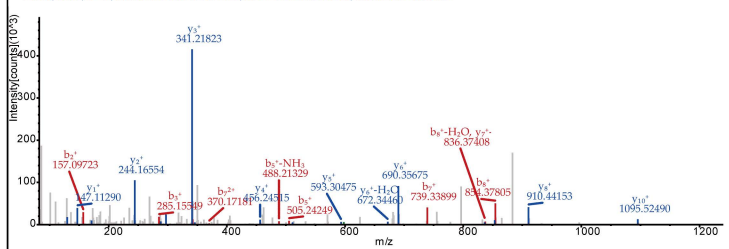**C**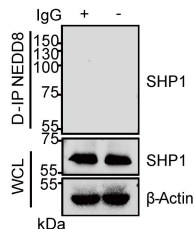**D**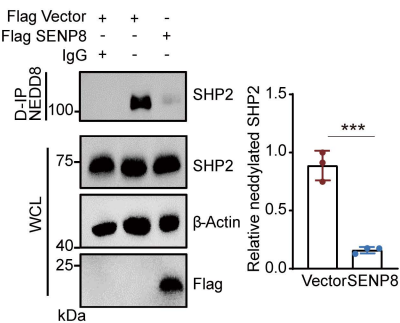**G**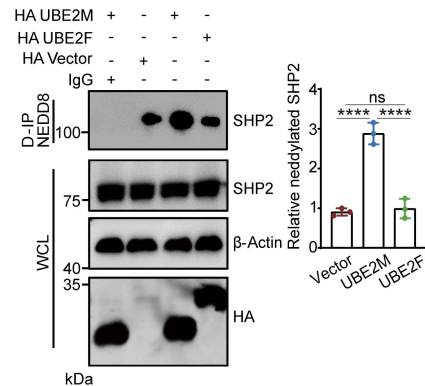**I**

|                                | 358      | 364 |
|--------------------------------|----------|-----|
| <i>Homo sapiens</i>            | TTKEVERG | K   |
| <i>Gorilla gorilla gorilla</i> | TTKEVERG | K   |
| <i>Macaca mulatta</i>          | TTKEVERG | K   |
| <i>Sus scrofa</i>              | TTKEVERG | K   |
| <i>Equus caballus</i>          | TTKEVERG | K   |
| <i>Canis lupus familiaris</i>  | TTKEVERG | K   |
| <i>Felis catus</i>             | TTKEVERG | K   |
| <i>Mus musculus</i>            | TTKEVERG | K   |
| <i>Rattus norvegicus</i>       | TTKEVERG | K   |

  

| SHP1 | 352       | 358 |
|------|-----------|-----|
|      | TTREVEKGR | RNK |
| SHP2 | 358       | 364 |
|      | TTKEVERG  | KSK |

**E**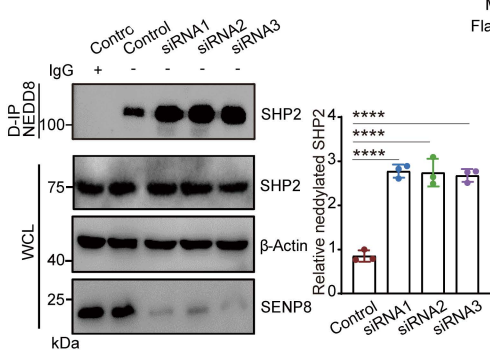**H**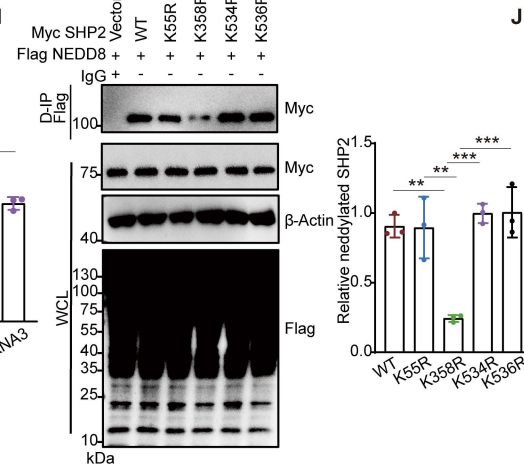**J**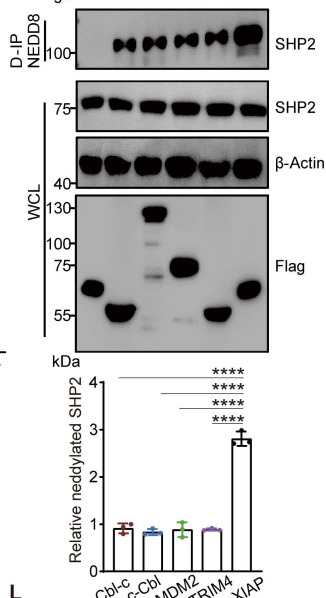**F**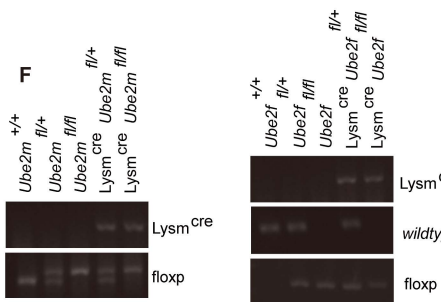**K**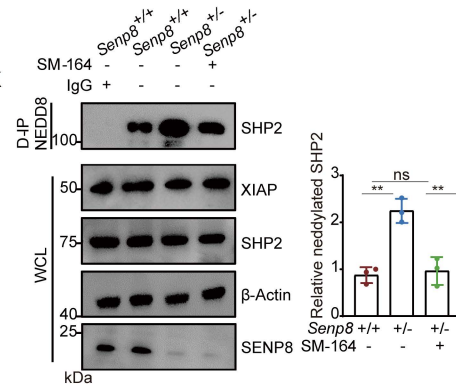**L**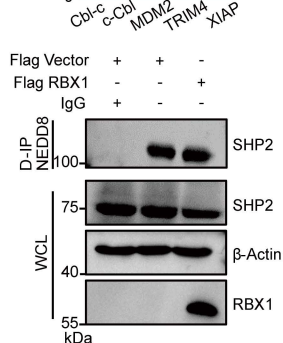

1519 **Supplemental Figure 2. Neddylation cascade of SHP2.**

1520 D-IP: Denaturing immunoprecipitated, WCL: the whole-cell lysate. (A) Potential  
1521 neddylation sites of SHP2 predicted by NeddyPredy. (B) Mass spectrum of the  
1522 UBE2M peptide from SHP2 co-immunoprecipitate in lysates of HEK293T cells. (C)  
1523 Western blot of BMDMs indicating that neddylation is not involved in SHP1. D-E  
1524 SENP8 deneddylation of SHP2 (n=3). HEK293T cells were transfected with SENP8  
1525 siRNA (D) or over-expressed with SENP8-Flag (E). (F) Genotyping of macrophage-  
1526 specific *Ube2f*<sup>mφ-/-</sup> and *Ube2m*<sup>mφ-/-</sup> mice strain. (G) UBE2M mediated SHP2  
1527 neddylation in HEK293T cells (n=3). (H) SHP2 mutation K358R did not completely  
1528 abolish its neddylation in HEK293T cells (n=3). (I) Sequence alignment of the region  
1529 which contains the neddylation site of SHP2 in different species (up). Sequence  
1530 alignment between SHP1 and SHP2 (down). J-K XIAP mediated SHP2 neddylation in  
1531 HEK293T cells and BMDMs (n=3). SM-164: inhibitor of XIAP (100 nM,4h). (L)  
1532 RBX1 (neddylation E3 of Cullin1) RBX1 was not involved in SHP2 neddylation in  
1533 HEK293T cells. Data are expressed as mean ± SD; 2-tailed unpaired Student's t-test  
1534 (D), 1-way ANOVA followed by Tukey's posthoc test (E, G, H, J, K); non-significant  
1535 (ns), p > 0.05; \*p < 0.05; \*\*p < 0.01; \*\*\*p < 0.001; \*\*\*\*p < 0.0001.

1536

1537

1538

1539

1540

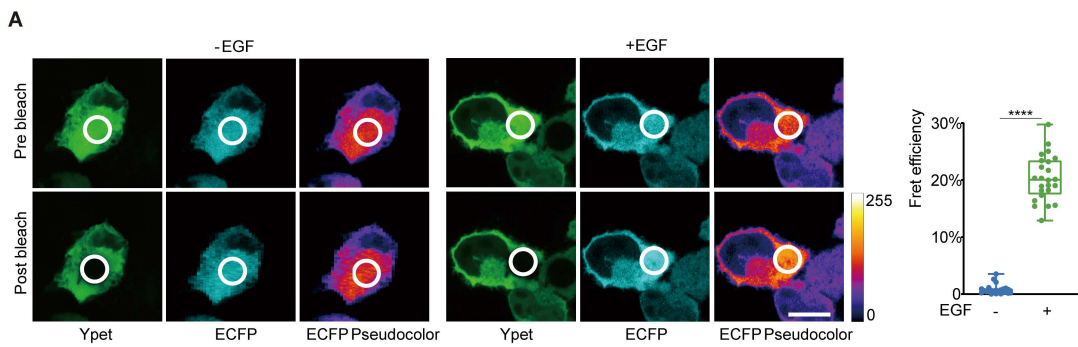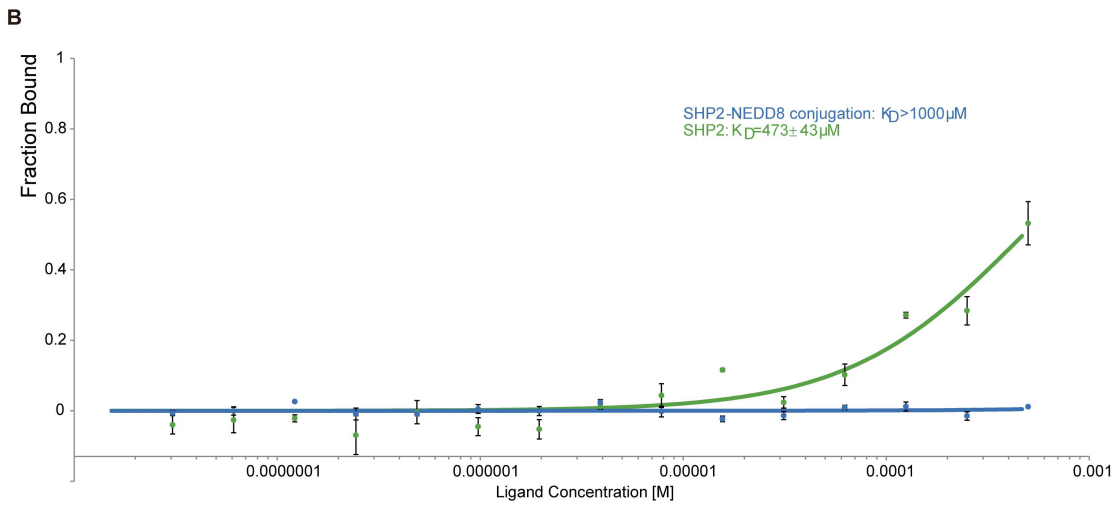

1541 **Supplemental Figure 3. SHP2 neddylation inhibits its binding to phospho-ligand.**

1542 (A) FRET efficiency of SHP2 biosensor was assessed by acceptor photobleaching EGF  
1543 stimulation (10ng/ml,15min), scale bars, 10 $\mu$ m, (cell number=24). (B) MST  
1544 measurement of SHP2 and NEDD8-SHP2 conjugation binding to fluorescently labeled  
1545 2P-IRS-1, (n=3). Data are expressed as mean  $\pm$  SD; 2-tailed unpaired Student's t-test  
1546 (A); non-significant (ns),  $p > 0.05$ ; \* $p < 0.05$ ; \*\* $p < 0.01$ ; \*\*\* $p < 0.001$ ; \*\*\*\* $p < 0.0001$ .

1547

1548

1549

1550

1551

1552

1553

1554

1555

1556

1557

1558

1559

1560

1561

1562

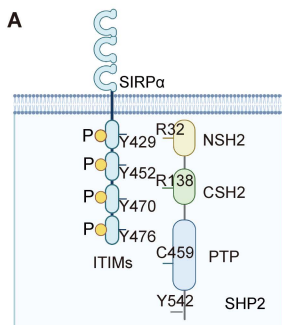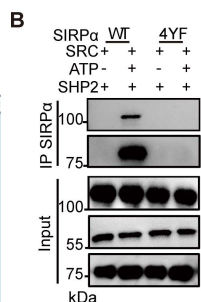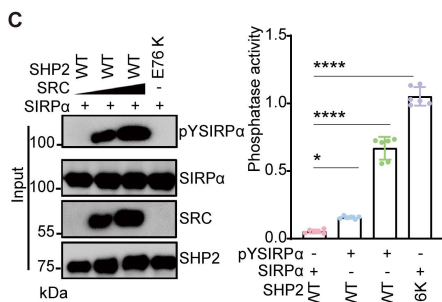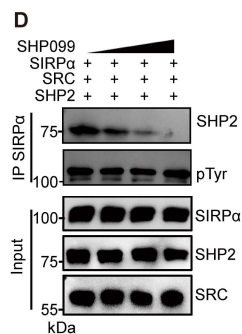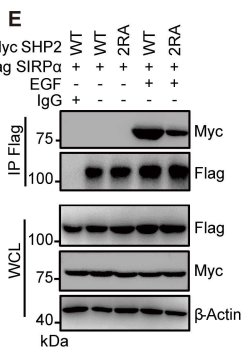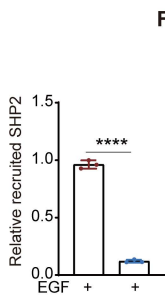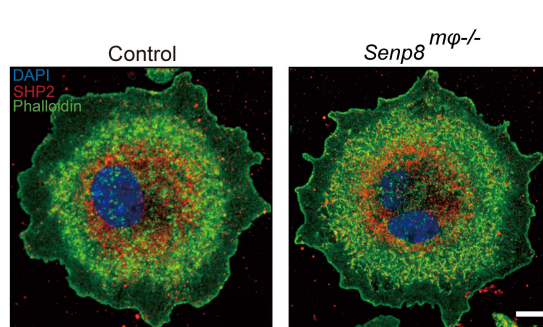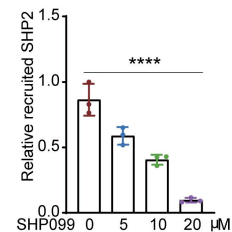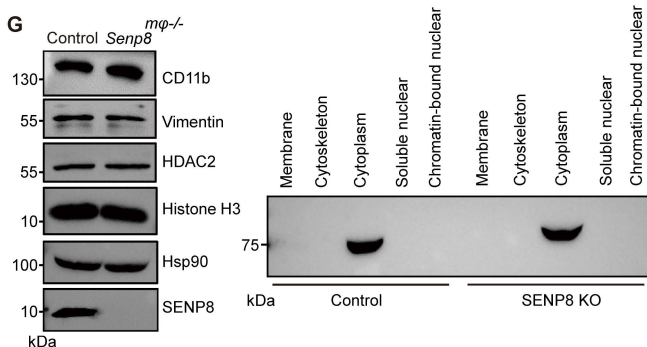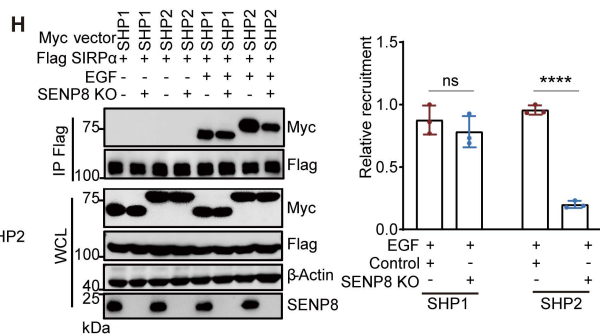



1563 **Supplemental Figure 4. Phosphorylated SIRP $\alpha$  recruits and activates SHP2.**

1564 D-IP: Denaturing immunoprecipitated, WCL: the whole-cell lysate. (A) The schematic  
1565 diagram of the SIRP $\alpha$  ITIM motif activating SHP2 was shown. (B) SIRP $\alpha$  and its  
1566 mutation protein were phosphorylated by SRC *in vitro*, and SHP2 was added to detect  
1567 its binding. (C) SIRP $\alpha$  proteins were phosphorylated by SRC *in vitro*. Then SHP2 was  
1568 mixed with pY-SIRP $\alpha$ , and *in vitro* SHP2 phosphatase assay showed phospho-ITIMs  
1569 activated SHP2 (n=6). (D) SIRP $\alpha$  proteins were phosphorylated by SRC *in vitro*.  
1570 SHP099 pre-treated SHP2 was mixed with pY-SIRP $\alpha$  to detect its binding (n=3). (E)  
1571 Western blot indicating SHP2 recruitment toward SIRP $\alpha$  receptor under EGF  
1572 stimulation (10ng/ml,15min) in HEK293T cells (n=3). (F) Confocal microscopy  
1573 visualization of SHP2 localization in indicated BMDMs, scale bars, 10 $\mu$ m. (G) Western  
1574 blot indicating SHP2 location of different subcellular fractionation in indicated  
1575 BMDMs. (H) Western blot indicating that SHP2 but not SHP1 recruitment of SIRP $\alpha$   
1576 receptor was disrupted by neddylation under EGF stimulation (10ng/ml,15min) in  
1577 HEK293T cells (n=3). Data are expressed as mean  $\pm$  SD; 2-tailed unpaired Student's t-  
1578 test (E), 1-way ANOVA followed by Tukey's posthoc test (C, D), 2-way ANOVA  
1579 followed by Tukey's posthoc test H; non-significant (ns),  $p > 0.05$ ; \* $p < 0.05$ ; \*\* $p < 0.01$ ;  
1580 \*\*\* $p < 0.001$ ; \*\*\*\* $p < 0.0001$ .

1581

1582

1583

1584

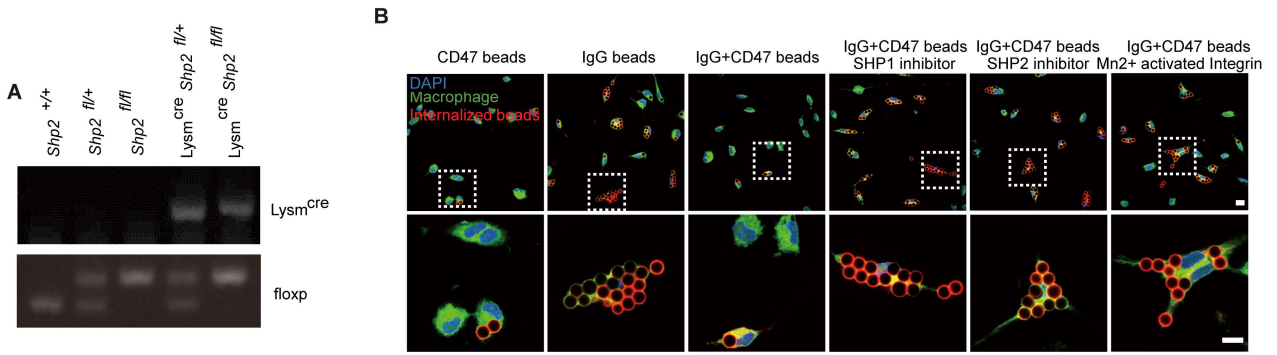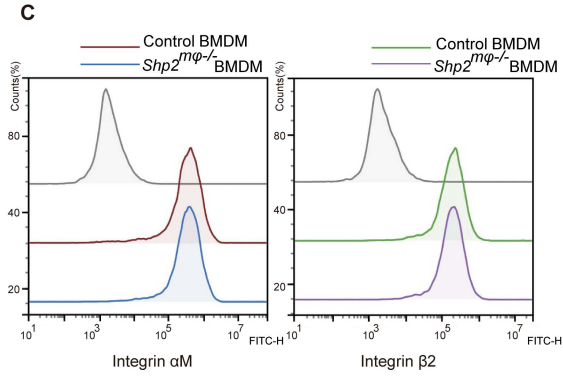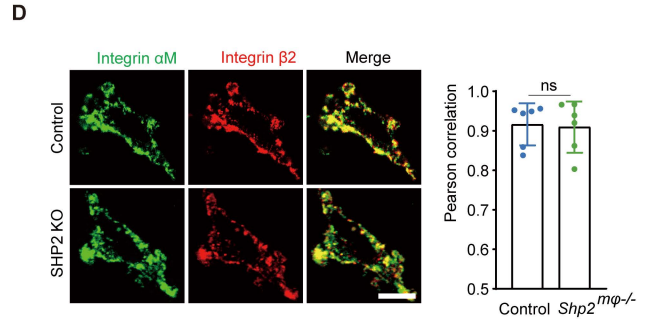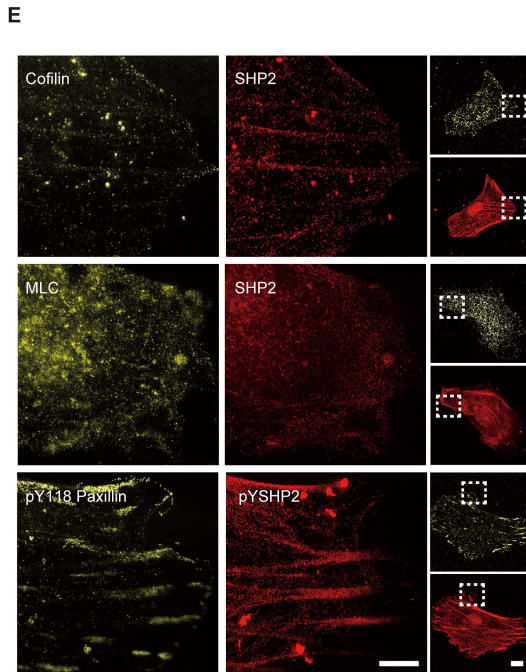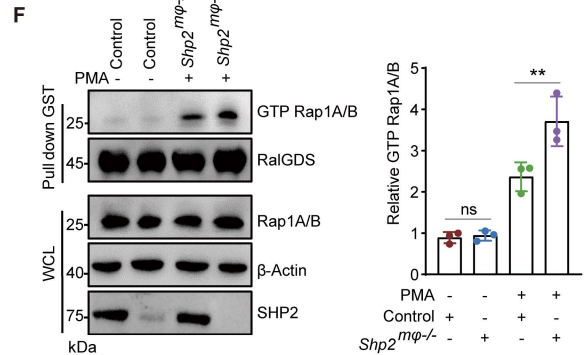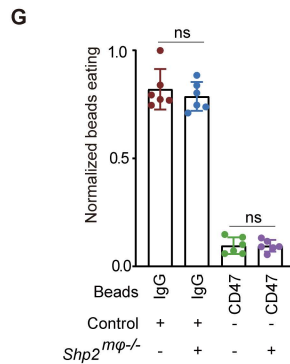

1585 **Supplemental Figure 5. SHP2 mediation of the CD47/SIRP $\alpha$  axis relies on integrin**  
1586  **$\alpha$ M $\beta$ 2.**

1587 (A) Genotyping of macrophage-specific *Shp2*<sup>mq<sup>-/-</sup></sup> mice strain. (B) High content  
1588 screening images depicted the normalized beads eating of indicated BMDMs described  
1589 in Figure 6A. BMDMs were labeled with CellMask and DAPI, beads are outlined in  
1590 red, scale bars, 10 $\mu$ m. (C) Surface expression of integrin  $\alpha$ M or  $\beta$ 2 in Control and SHP2  
1591 KO BMDMs were analyzed by flow cytometry. (D) Confocal microscopy images  
1592 showed colocalization of integrin  $\alpha$ M and  $\beta$ 2 in indicated BMDMs (n=6), scale bars,  
1593 10 $\mu$ m. (E) The colocalization between SHP2 and Cofilin, Myosin / pY542 SHP2 and  
1594 pY118 Paxillin were detected in MEF cells under PMA stimulation, scale bars, 5 $\mu$ m.  
1595 (F) Western blot analysis of SHP2 deletion effect on Rap GTPase under PMA  
1596 stimulation (100 ng/ml, 15min) (n=3). (G) The normalized IgG or CD47 beads eating of  
1597 indicated BMDMs (n=6). Data are expressed as mean  $\pm$  SD; 1-way ANOVA followed  
1598 by Tukey's posthoc test (G, F), Pearson correlation (D); non-significant (ns),  $p > 0.05$ ; \*  
1599  $p < 0.05$ ; \*\* $p < 0.01$ ; \*\*\* $p < 0.001$ ; \*\*\*\* $p < 0.0001$ .

1600

1601

1602

1603

1604

1605

1606

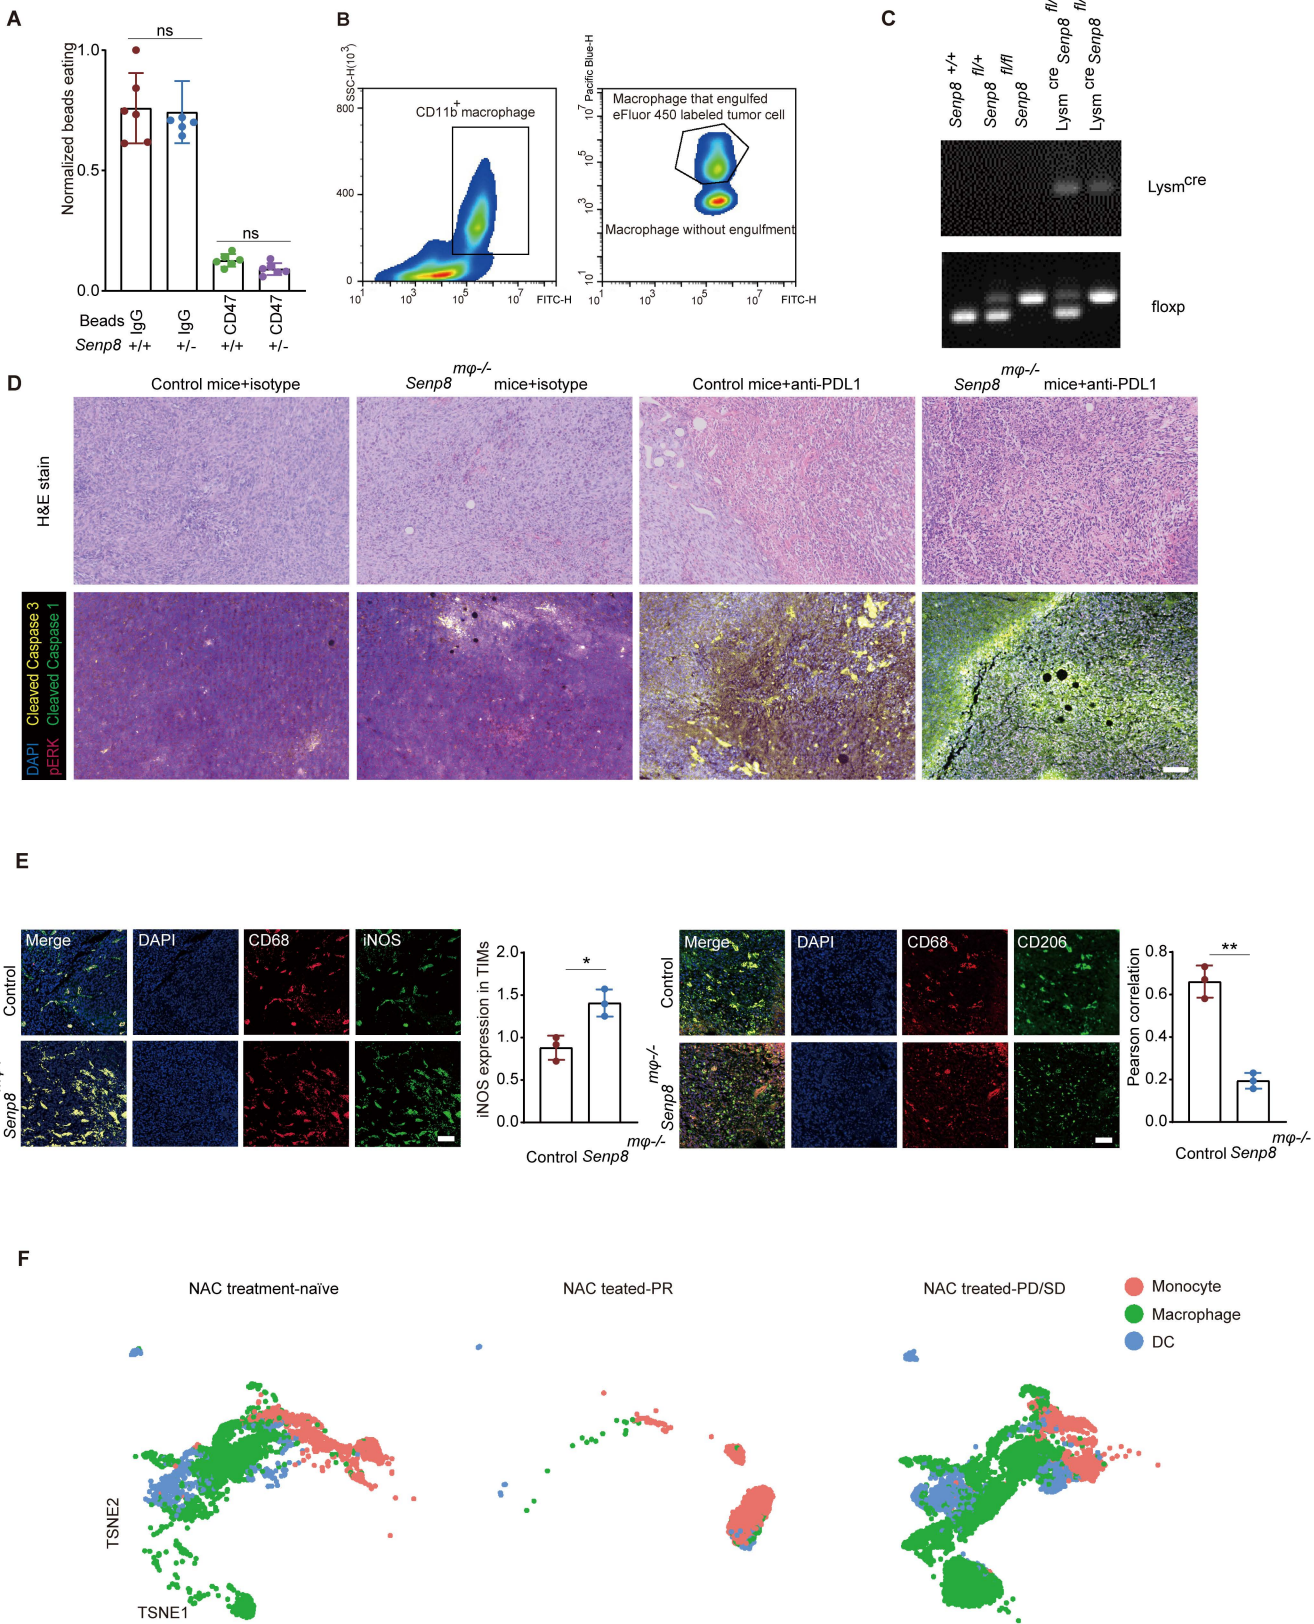

1607 **Supplemental Figure 6. Enhancement of SHP2 neddylation promotes macrophage**  
1608 **engulfment in response to antibodies.**

1609 (A) The normalized beads eating of indicated BMDMs (n=6). (B) Representative flow  
1610 analysis plots of BMDMs that had swallowed the tumor cells. Phagocytosis was  
1611 calculated as the percentage of eFluor405<sup>+</sup>CD11b<sup>+</sup> cells among CD11b<sup>+</sup> cells. (C)  
1612 Genotyping of macrophage-specific *Senp8*<sup>mp<sup>-/-</sup></sup> mice strain. (D) Representative images  
1613 of MC38 tumor section under 10X magnification of Figure 9E, scale bars, 100μm. (E)  
1614 Images of indicated MC38 tumors (Figure 9E) staining iNOS, CD206 and CD68 (n=3),  
1615 scale bars, 50μm. (F) TSNEs of tumor-infiltrating myeloid cells in all samples (n of  
1616 treatment naïve samples=12, n of NAC-treated PR samples=8, and n of NAC-treated  
1617 PD/SD samples=5). Data are expressed as mean ± SD; 1-way ANOVA followed by  
1618 Tukey's posthoc test (A); Pearson correlation (E); 2-tailed unpaired Student's t-test (E).  
1619 non-significant (ns), p > 0.05; \*p < 0.05; \*\*p < 0.01; \*\*\*p < 0.001; \*\*\*\*p < 0.0001.

1620

1621

1622

1623

1624

1625

1626

1627

1628

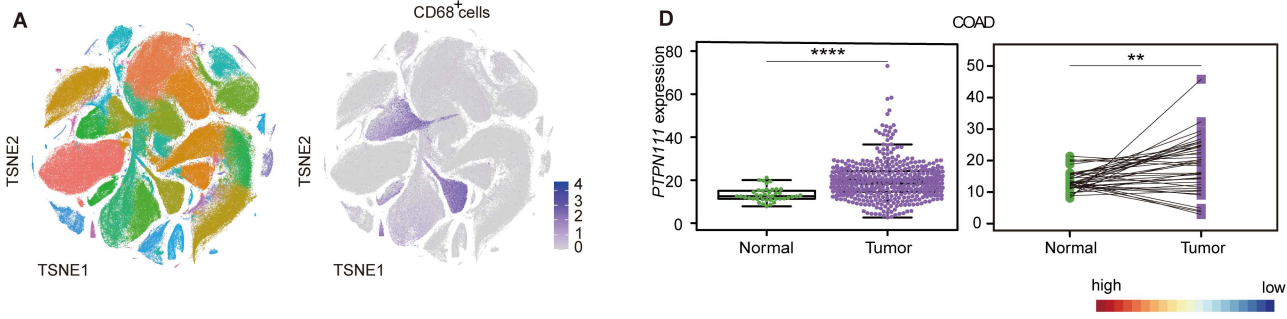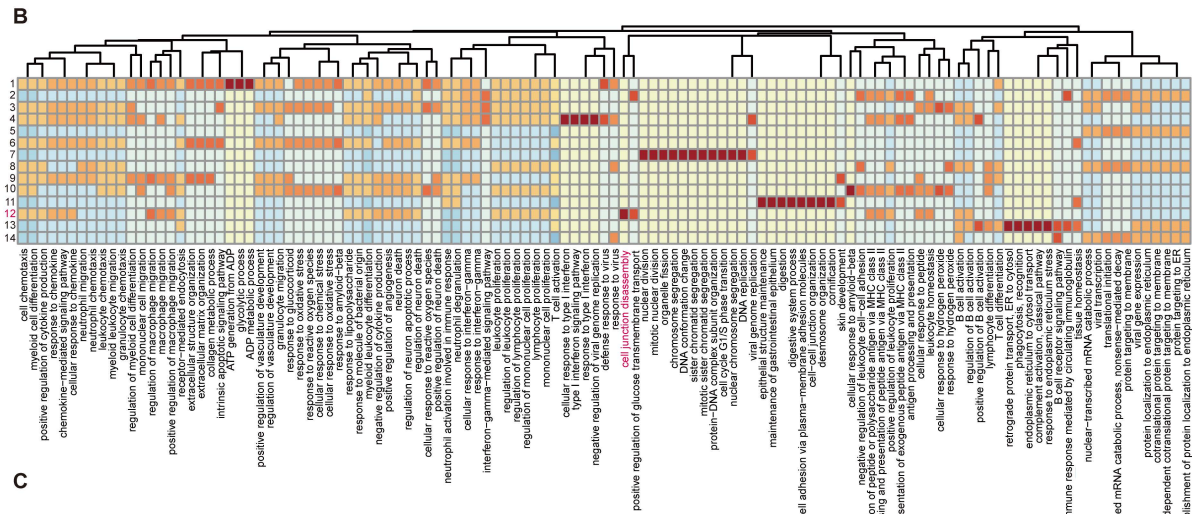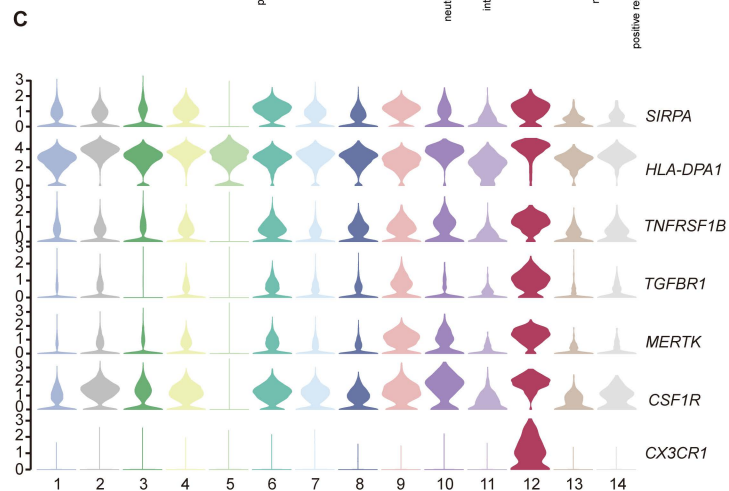

1629 **Supplemental Figure 7. The immunosuppressive microenvironment of colorectal**  
1630 **cancer relies on the CD47/SIRP $\alpha$  axis.**

1631 (A) TSNEs of all type cells of dissociated CRC tumor tissues, CD68<sup>+</sup> cells were  
1632 extracted (n of MMRd samples=28, n of MMRp samples=34). (B) GO analysis of  
1633 tumor-infiltrating macrophage clusters in MMRd and MMRp tumor samples. (C) Violin  
1634 plot showed the relative expression of cell clusters-associated genes in MMRd and  
1635 MMRp tumor samples. (D)The *PTPN11* expression from TCGA-COAD cohort (n of  
1636 adjacent normal colon tissue samples=41, n of colon adenocarcinoma tissue  
1637 samples=473). Data are expressed as mean  $\pm$  SD; Wilcoxon test (D); non-significant  
1638 (ns),  $p > 0.05$ ; \* $p < 0.05$ ; \*\* $p < 0.01$ ; \*\*\* $p < 0.001$ ; \*\*\*\* $p < 0.0001$ .

1639

1640

1641

1642

1643

1644

1645

1646

1647

1648

1649

1650

**Supplemental Table 1**

| REAGENT or RESOURCE                                  | SOURCE     | IDENTIFIER    |
|------------------------------------------------------|------------|---------------|
| <b>Antibodies (applications)</b>                     |            |               |
| Rabbit Anti CD47                                     | Abcam      | Cat: ab218810 |
| Rabbit Anti SIRP alpha                               | Abcam      | Cat: ab191419 |
| Rabbit Anti SHP2 (phospho Y542)                      | Abcam      | Cat: ab62322  |
| Rabbit Anti NEDD8                                    | Abcam      | Cat: ab81264  |
| Rabbit Anti UBE2M                                    | Abcam      | Cat: ab109507 |
| Rabbit Anti XIAP                                     | Abcam      | Cat: ab229050 |
| Rabbit Anti FAK (phospho Y397) antibody              | Abcam      | Cat: ab81298  |
| Mouse Anti Talin 1                                   | Abcam      | Cat: ab108480 |
| Rabbit Anti Talin 2                                  | Abcam      | Cat: ab108967 |
| Rabbit Anti Ki-67                                    | Abcam      | Cat: ab16667  |
| Rabbit Anti Anti-Hsp90 beta                          | Abcam      | Cat: ab203085 |
| Rabbit Anti Na/K ATPase                              | Abcam      | Cat: ab76020  |
| Rabbit Anti HDAC2                                    | Abcam      | Cat: ab32117  |
| Rabbit Anti Cullin1                                  | Abcam      | Cat: ab75817  |
| VeriBlot                                             | Abcam      | Cat: ab131366 |
| Rabbit Anti $\beta$ -Actin                           | Abclonal   | Cat: AC026    |
| Mouse Control IgG                                    | Abclonal   | Cat: AC011    |
| Rabbit Control IgG                                   | Abclonal   | Cat: AC005    |
| Purified Mouse IgG2a, $\kappa$ Isotype Ctrl Antibody | BioLegend  | Cat: 401501   |
| Purified Rat IgG2b, $\kappa$ Isotype Ctrl Antibody   | BioLegend  | Cat: 400643   |
| Purified anti-mouse/human CD11b Antibody             | BioLegend  | Cat: 101248   |
| Anti-human CD274 (B7-H1, PD-L1) Antibody             | BioLegend  | Cat: 329728   |
| Purified Mouse IgG2b, $\kappa$ Isotype Ctrl Antibody | BioLegend  | Cat: 402201   |
| Anti-mouse CD18 FITC                                 | BioLegend  | Cat: 101405   |
| Anti-mouse CD11B FITC                                | BioLegend  | Cat: 101205   |
| Anti-human CD45 APC                                  | BioLegend  | Cat:304011    |
| Anti-mouse CD45 APC                                  | BioLegend  | Cat:157605    |
| Anti-human CD68 FITC                                 | BioLegend  | Cat:137005    |
| Anti-human CD68 FITC                                 | BioLegend  | Cat:333805    |
| Anti-human activated CD11B APC                       | BioLegend  | Cat: 301409   |
| PE anti-streptavidin antibody                        | BioLegend  | Cat: 410503   |
| Zombie Violet™ Fixable Viability Kit                 | BioLegend  | Cat: 423113   |
| Anti-mouse PD-L1 (B7-H1)                             | BIO x cell | Cat: BP0101   |
| Rat IgG2b isotype control                            | BIO x cell | Cat: BP0090   |
| Anti-mouse/human/rat CD47                            | BIO x cell | Cat: BE0283   |
| Mouse IgG1 isotype control                           | BIO x cell | Cat: BE0083   |
| Rabbit Anti SHP2                                     | CST        | Cat: 3397     |
| Rabbit Anti Cleaved Caspase-3                        | CST        | Cat: 9579     |
| Rabbit Anti Phospho-Akt (Ser473)                     | CST        | Cat: 4060     |



|                                                          |                 |                 |
|----------------------------------------------------------|-----------------|-----------------|
| Rabbit Anti CD11b                                        | CST             | Cat: 17800      |
| Rabbit Anti Histone H3                                   | CST             | Cat:4499        |
| Rabbit Anti Vimentin                                     | CST             | Cat: 5741       |
| Rabbit Anti Myosin Light Chain 2                         | CST             | Cat: 3672       |
| Rabbit Anti Cofilin                                      | CST             | Cat: 5175       |
| Rabbit Anti Phospho-Cofilin (Ser3)                       | CST             | Cat: 3311       |
| Rabbit Anti Phospho-Paxillin (Tyr118)                    | CST             | Cat: 69363      |
| Rabbit Anti Phospho-Myosin Light Chain 2 (Thr18/Ser19)   | CST             | Cat: 95777      |
| Rabbit Anti Phospho-p44/42 MAPK (Erk1/2) (Thr202/Tyr204) | CST             | Cat: 4370       |
| Mouse Anti Phospho-Tyrosine Alexa Fluor® 488 Conjugate)  | CST             | Cat: 9414       |
| Rabbit Anti Phospho-Tyrosine                             | CST             | Cat: 8954       |
| Rabbit Anti Flag                                         | CST             | Cat: 14793      |
| Rabbit Anti Phospho-SHP-1 (Tyr564)                       | CST             | Cat: 8849       |
| Mouse Anti HA                                            | CST             | Cat: 2367       |
| Rabbit Anti INOS                                         | CST             | Cat:13120       |
| Rabbit Anti INOS                                         | CST             | Cat:24595       |
| Anti-Mouse CD80 APC                                      | eBioscience     | Cat: 17-0801-81 |
| Anti-Mouse CD86 APC                                      | eBioscience     | Cat: 17-0862-81 |
| Anti-Mouse MHCII PE                                      | eBioscience     | Cat: 12-5322-81 |
| FDbio-Femto Ecl                                          | FUDE biological | Cat: FD8030     |
| Goat anti Mouse IgG (H+L) Alexa Fluor Plus 488           | Invitrogen      | Cat: A32723     |
| Goat anti Rabbit IgG (H+L) Alexa Fluor Plus 488          | Invitrogen      | Cat: A32731     |
| Goat anti Mouse IgG (H+L) Alexa Fluor Plus 555           | Invitrogen      | Cat: A32727     |
| Goat anti Rabbit IgG (H+L) Alexa Fluor Plus 555          | Invitrogen      | Cat: A32732     |
| Goat anti Rabbit IgG (H+L) Alexa Fluor Plus 647          | Invitrogen      | Cat: A32733     |
| Goat anti Mouse IgG (H+L) Alexa Fluor Plus 647           | Invitrogen      | Cat: A32728     |
| Donkey anti Goat IgG (H+L) Alexa Fluor Plus 647          | Invitrogen      | Cat: A32849     |
| Rabbit Anti Kindlin 3                                    | Invitrogen      | Cat: PA5-116402 |
| Rabbit Anti SENP8                                        | Invitrogen      | Cat: PA5-118500 |
| Donkey Anti SHP2                                         | Invitrogen      | Cat: PA5-17956  |
| Goat anti mouse IgG HRP                                  | MultiSciences   | Cat: 70-GAM007  |
| Goat anti rabbit IgG HRP                                 | MultiSciences   | Cat: 70-GAR007  |
| Rabbit anti Myc                                          | Origene         | Cat: TA591009   |

|                                                    |                  |                     |
|----------------------------------------------------|------------------|---------------------|
| Mouse anti Myc                                     | Origene          | Cat:<br>TA150121    |
| Mouse anti-Flag                                    | Origene          | Cat:<br>TA50011-100 |
| HRP Goat Anti-Mouse IgG LCS                        | Abbkine          | Cat: A25012         |
| HRP Goat Anti-Mouse IgG HCS                        | Abbkine          | Cat: A25112         |
| Mouse Anti CD18                                    | Santa Cruz       | Cat: sc-8420        |
| Mouse Anti CD68                                    | Santa Cruz       | Cat: sc-20060       |
| Mouse Anti Paxillin                                | Santa Cruz       | Cat: sc-<br>365379  |
| Mouse Anti SENP8                                   | Santa Cruz       | Cat: sc-<br>271498  |
| Mouse Anti Cullin5                                 | Santa Cruz       | Cat: sc-<br>373822  |
| Mouse Anti SHP1                                    | Santa Cruz       | Cat: sc-7289        |
| Mouse Anti SHP2                                    | Santa Cruz       | Cat: sc-7384        |
| Rabbit Anti UBE2F                                  | Santa Cruz       | Cat: sc-<br>398668  |
| Anti-streptavidin antibody                         | Santa Cruz       | Cat: sc-52234       |
| Duolink ® In Situ Red Starter Kit Mouse/Rabbit     | Sigma            | Cat:<br>DUO92101    |
| Mouse Anti NEDD8                                   | Sigma            | Cat: N2786          |
| <b>Transfection Reagents</b>                       |                  |                     |
| Mouse macrophage nucleofector Kit                  | Lonza            | Cat: VVPA-<br>1009  |
| INTERFERin                                         | Polyplus         | Cat:<br>101000028   |
| Lipo3000                                           | Thermo           | Cat:<br>L3000008    |
| <b>Other Reagents</b>                              |                  |                     |
| Multi-fluorescent Immunohistochemical Staining Kit | Absin            | Cat: abs50029       |
| Biotinylated Mouse CD47 Protein                    | Acro biosystem   | Cat: CD7-<br>M82E4  |
| SHP2 biosensor                                     | Addgene          | Cat: 134346         |
| Hoechst 33342                                      | Beyotime         | Cat: C1028          |
| JC-1                                               | Beyotime         | Cat: C2005          |
| SureBeads™ Protein G Magnetic Beads                | BIO-RAD          | Cat:1614023         |
| SureBeads™ Protein A Magnetic Beads                | BIO-RAD          | Cat:1614013         |
| Biotin and Cy5 label of SHP2 Activating Peptide    | BIOSS antibodies | N/A                 |
| pep-20-D12                                         | Genesript        | N/A                 |
| 2P-IRS-1                                           | Genesript        | N/A                 |
| FBS                                                | Gibco            | Cat:<br>10099141C   |

|                                        |             |                     |
|----------------------------------------|-------------|---------------------|
| DMEM                                   | Gibco       | Cat: 11995065       |
| RPMI1640                               | Gibco       | Cat: 61870036       |
| 0.25% Trypsin-EDTA                     | Gibco       | Cat: 25200072       |
| Advanced DMEM/F-12                     | Gibco       | Cat: 12634010       |
| Opti-MEM                               | Gibco       | Cat: 51985034       |
| HEPES                                  | Gibco       | Cat: 15630106       |
| Glutamax                               | Gibco       | Cat: 35050061       |
| B-27 Supplement Minus Vitamin A        | Gibco       | Cat: 12587010       |
| Penicillin-Streptomycin                | Gibco       | Cat: 15140122       |
| PBS                                    | Hyclone     | Cat:<br>SH30256.01  |
| EDTA                                   | Invitrogen  | Cat:<br>AM9260G     |
| CFSE                                   | Invitrogen  | Cat: 65-0850-<br>84 |
| LysoTracker                            | Invitrogen  | Cat: L7528          |
| DiFMUP                                 | Invitrogen  | Cat: D6567          |
| Streptavidin                           | Invitrogen  | Cat: S888           |
| CellMask Plasma Membrane Stains        | Invitrogen  | Cat: C10046         |
| Wheat Germ Agglutinin Conjugates       | Invitrogen  | Cat: W32466         |
| Dynabeads Sheep anti-Rat IgG           | Invitrogen  | Cat: 11035          |
| Cell Proliferation Dye eFluor™ 450     | Invitrogen  | Cat: 65-0842-<br>85 |
| Cell Proliferation Dye eFluor™ 670     | Invitrogen  | Cat: 65-0840-<br>85 |
| Dynabeads Streptavidin Trial Kit       | Invitrogen  | Cat: 65801D         |
| IL-6 Mouse Uncoated ELISA Kit          | Invitrogen  | Cat: 88-7064-<br>88 |
| IL-1 beta Mouse Uncoated ELISA Kit     | Invitrogen  | Cat: 88-7013-<br>88 |
| TNF alpha Mouse Uncoated ELISA Kit     | Invitrogen  | Cat: 88-7324-<br>88 |
| MCP-1/CCL2 Mouse Uncoated ELISA Kit    | Invitrogen  | Cat: 88-7391-<br>88 |
| IFN gamma Mouse Uncoated ELISA Kit     | Invitrogen  | Cat: 88-7314-<br>88 |
| Mouse interleukin 8 ELISA Kit          | MyBioSource | Cat:<br>MBS1601073  |
| M-CSF                                  | Novoprotein | Cat: CJ46           |
| NovoRec® plus One-step PCR Cloning Kit | Novoprotein | Cat: NR005-<br>01A  |
| IL-2                                   | Novoprotein | Cat: C013           |
| hEGF                                   | Novoprotein | Cat: C029           |

|                                                          |                      |                  |
|----------------------------------------------------------|----------------------|------------------|
| NEDD8 Conjugation Initiation Kit                         | R&D Systems          | Cat: K-800       |
| RhNEDD8 AMC                                              | R&D Systems          | Cat: UL-552-050  |
| Protein A/G PLUS-Agarose                                 | Santa Cruz           | Cat: sc2003      |
| MLN4924                                                  | Selleck              | Cat: S7109       |
| SHP099                                                   | Selleck              | Cat: S6388       |
| TPI-1                                                    | Selleck              | Cat: S6570       |
| TNO155                                                   | Selleck              | Cat: S8987       |
| Anti-FLAG <sup>®</sup> M2 Magnetic Beads                 | Sigma                | Cat: M8823       |
| 3dGRO <sup>™</sup> L-WRN Conditioned Media Supplement    | Sigma                | Cat: SCM105      |
| PMA                                                      | Sigma                | Cat: P1585       |
| DNase I                                                  | Sigma                | Cat: DN25        |
| Nicotinamide                                             | Sigma                | Cat: 72340       |
| N-Acetylcysteine                                         | Sigma                | Cat: A0737       |
| SB-202190                                                | Sigma                | Cat: S7067       |
| Human CEACAM5 ELISA kit                                  | Solarbio             | Cat: SEKH-0130   |
| Streptavidin polystyrene particles                       | Spherotech           | Cat: 73-SVP-50-5 |
| DTBP                                                     | Thermo               | Cat: 20665       |
| BCA Protein Assay Kit                                    | Thermo               | Cat: 23225       |
| Ham's F-12 Nutrient Mix powder                           | Thermo               | Cat: 21700075    |
| Pierce Glutathione Agarose Resin                         | Thermo               | Cat: 16109       |
| DAPI                                                     | Thermo               | Cat: 62248       |
| Subcellular Protein Fractionation Kit for Cultured Cells | Thermo               | Cat: 78840       |
| A83-01                                                   | Tocris               | Cat: 2939        |
| Gastrin                                                  | Tocris               | Cat: 3006        |
| Type I collagen gel                                      | Trevigen             | Cat: 3440-100-01 |
| Collagenase IV                                           | Worthington          | Cat: LS004188    |
| TRITC Phalloidin                                         | Yeasen Biotechnology | Cat: 40734ES75   |
| FITC Phalloidin                                          | Yeasen Biotechnology | Cat: 40735ES75   |
| <b>Plasmids</b>                                          |                      |                  |
| pLKO.1-TRC Cloning Vector                                | Addgene              | Cat: 632561      |
| psPAX2                                                   | Addgene              | Cat: 12260       |
| pMD2.G                                                   | Addgene              | Cat: 12259       |
| LentiCRISPRv2                                            | Addgene              | Cat: 10878       |
| PXJ40(Myc, Flag, HA, mCherry)                            |                      | N/A              |
| <b>Sequence for gene knockdown</b>                       |                      |                  |
| siScramble: 5'-UUCUCCGAACGUGUCACGUTT-3'                  | General Biol Inc     | N/A              |

|                                                           |                      |     |
|-----------------------------------------------------------|----------------------|-----|
| siSENP8#1: 5'-CCACUGGAGUUUAUUGGUCUA-3'                    | General Biol Inc     | N/A |
| siSENP8#2:5'-GCAUACAUCACAAAGAAGATT-3',                    | General Biol Inc     | N/A |
| siSENP8#3:5'-ACCAACUUAUUUGAACAUUA-3'                      | General Biol Inc     | N/A |
| ShScramble: 5'-CCTAAGGTTAAGTCGCCCTCG-3',                  | TsingkeBiotechnology | N/A |
| ShSHP2: 5'-TTGAGACCAAGTGCAACAATT-3'                       | TsingkeBiotechnology | N/A |
| ShSIRPα1: 5'-AAGTGAAGGTGACTCAGCCTG-3'                     |                      |     |
| ShSIRPα2: 5'-AATCAGTGTCTGTTGCTGCTG-3'                     |                      |     |
| gRNA hSENP8#1: 5'-CCATGTAAGTCAAGACTACG-3'                 | TsingkeBiotechnology | N/A |
| gRNA hSENP8#2: 5'-CAACTCAGTTCACGCAAAGC-3'                 | TsingkeBiotechnology | N/A |
| <b>Primers for mice identification</b>                    |                      |     |
| Lysm <sup>cre</sup> -M-F: 5'-CCCAGAAATGCCAGATTACG-3'      | TsingkeBiotechnology | N/A |
| Lysm <sup>cre</sup> -M-R: 5'-CTTGGGCTGCCAGAATTTCTC-3'     | TsingkeBiotechnology | N/A |
| Lysm <sup>cre</sup> -WT-F: 5'-TTACAGTCGGCCAGGCTGAC-3'     | TsingkeBiotechnology | N/A |
| Ube2m <sup>fl/fl</sup> -F: 5'-CCGTGTCGTGAAGATTGTGAAGG-3'  | TsingkeBiotechnology | N/A |
| Ube2m <sup>fl/fl</sup> -R: 5'-ACCTCCACTGTCCTTCTCGTCTC-3'  | TsingkeBiotechnology | N/A |
| Ube2f <sup>fl/fl</sup> -F: 5'-CCAGGGTGGAAAATTCAGTTT-3'    | TsingkeBiotechnology | N/A |
| Ube2f <sup>fl/fl</sup> -R1: 5'-GCGAGCTCAGACCATAACTTCG-3'  | TsingkeBiotechnology | N/A |
| Ube2f <sup>fl/fl</sup> -R2: 5'-CCCTGGAATTTCCGGTATTATA-3'  | TsingkeBiotechnology | N/A |
| Shp2 <sup>fl/fl</sup> -F: 5'-CAGTTGCAACTTTCTTACCTC-3'     | TsingkeBiotechnology | N/A |
| Shp2 <sup>fl/fl</sup> -R: 5'-GCAGGAGACTGCAGCTCAGTGATG-3'  | TsingkeBiotechnology | N/A |
| Senp8-F: 5'-CAGGAGACAGAGGCAGAAGAA-3'                      | TsingkeBiotechnology | N/A |
| Senp8-R1: 5'-GGATATTGTACTCACATGACCAAGA-3'                 | TsingkeBiotechnology | N/A |
| Senp8-R2: 5'-GGATTAAGTTTGAGGAAGGTGACA-3'                  | TsingkeBiotechnology | N/A |
| Senp8 <sup>fl/fl</sup> -F: 5'-CCAGGAACACTGATTCCTATGCAC-3' | TsingkeBiotechnology | N/A |
| Senp8 <sup>fl/fl</sup> -R: 5'-AATGGATGTGACAGTGGTGAGAG-3'  | TsingkeBiotechnology | N/A |
| <b>Primers for QPCR</b>                                   |                      |     |
| Human SENP8 F:5'-ACTGCGGCAATCAGATGTCTC-3'                 | TsingkeBiotechnology | N/A |
| Human SENP8 R:5'-GGAACATGGCAATCTCTGCTG-3'                 | TsingkeBiotechnology | N/A |
| Human UBA3 F:5'-AAGCACTTACTACGCTTAGC-3'                   | TsingkeBiotechnology | N/A |
| Human UBA3 R:5'-TGGAGTATGACTGTGGTCCTTT-3'                 | TsingkeBiotechnology | N/A |
| Human UBE2M F:5'-ATGAGGGCTTCTACAAGAGTGG-3'                | TsingkeBiotechnology | N/A |
| Human UBE2M R:5'-ATTGTCTCACACTTACCTTGG-3'                 | TsingkeBiotechnology | N/A |
| Human XIAP F:5'-ACCGTGCGGTGCTTAGTT-3'                     | TsingkeBiotechnology | N/A |
| Human XIAP R:5'-TGCGTGGCACTATTTCAAGATA-3'                 | TsingkeBiotechnology | N/A |
| Human 18s rRNA F:5'-GTAACCCGTTGAACCCCAATT-3'              | TsingkeBiotechnology | N/A |
| Human 18s rRNA R:5'-CCATCCAATCGGTAGTAGCG-3'               | TsingkeBiotechnology | N/A |

1651

1652

1653

**Supplemental Table 2**

| Gender | IHC | Tumor location          | Gross appearance             | Histology                                       |
|--------|-----|-------------------------|------------------------------|-------------------------------------------------|
| Male   | MSS | Sigmoid colon           | Ulcerative type              | Moderately differentiated adenocarcinoma        |
| Male   | MSS | Rectum                  | Ulcerative type              | Moderately differentiated adenocarcinoma        |
| Male   | MSS | Sigmoid colon           | Ulcerative type              | Moderately differentiated adenocarcinoma        |
| Male   | MSS | Left-sided colon-Rectum | Ulcerative type              | Moderately differentiated adenocarcinoma        |
| Female | MSS | Left-sided colon        | protruded type               | Mucinous carcinoma                              |
| Female | MSS | Left-sided colon        | ulcerative-infiltrating type | Moderately differentiated adenocarcinoma        |
| Male   | MSS | Sigmoid colon           | protruded type               | Moderately differentiated adenocarcinoma        |
| Female | MSS | Sigmoid colon           | ulcerative type              | Moderately differentiated adenocarcinoma        |
| Female | MSS | Right-sided colon       | ulcerative type              | Moderately differentiated adenocarcinoma        |
| Male   | MSS | Right-sided colon       | ulcerative type              | Moderately differentiated adenocarcinoma        |
| Male   | MSS | Rectum                  | ulcerative type              | Moderately differentiated adenocarcinoma        |
| Male   | MSS | Right-sided colon       | ulcerative type              | Moderately-Poorly differentiated adenocarcinoma |
| Female | MSS | Sigmoid colon           | ulcerative type              | Moderately differentiated adenocarcinoma        |
| Female | MSS | Rectum                  | ulcerative type              | Moderately differentiated adenocarcinoma        |
| Male   | MSS | Rectum                  | ulcerative type              | Moderately differentiated adenocarcinoma        |
| Male   | MSS | Sigmoid colon           | ulcerative type              | Moderately differentiated adenocarcinoma        |

1655

1656

1657

1658

1659

1660

1661

1662

1663

1664

| Gender | IHC | Tumor location    | Gross appearance  | Histology                                       |
|--------|-----|-------------------|-------------------|-------------------------------------------------|
| Female | MSS | Right-sided colon | ulcerative type   | Moderately differentiated adenocarcinoma        |
| Male   | MSS | Sigmoid colon     | ulcerative type   | Moderately differentiated adenocarcinoma        |
| Female | MSS | Right-sided colon | ulcerative type   | Moderately-poorly differentiated adenocarcinoma |
| Female | MSS | Sigmoid colon     | ulcerative type   | Well-moderately differentiated adenocarcinoma   |
| Female | MSS | Rectum            | ulcerative type   | Moderately differentiated adenocarcinoma        |
| Male   | MSS | Rectum            | ulcerative type   | Signet ring cell carcinoma                      |
| Male   | MSS | Rectum            | ulcerative type   | Poorly differentiated adenocarcinoma            |
| Male   | MSS | Right-sided colon | infiltrating type | Moderately differentiated adenocarcinoma        |
| Female | MSS | Right-sided colon | protruded type    | Moderately differentiated adenocarcinoma        |
| Male   | MSS | Rectum            | protruded type    | Moderately-poorly differentiated adenocarcinoma |
| Female | MSS | Left-sided colon  | protruded type    | Moderately differentiated adenocarcinoma        |
| Male   | MSS | Left-sided colon  | ulcerative type   | Moderately differentiated adenocarcinoma        |
| Male   | MSS | Left-sided colon  | infiltrating type | Moderately-poorly differentiated adenocarcinoma |
| Female | MSS | Right-sided colon | ulcerative type   | Moderately-poorly differentiated adenocarcinoma |
| Male   | MSS | Rectum            | ulcerative type   | Moderately differentiated adenocarcinoma        |
| Male   | MSS | Left-sided colon  | ulcerative type   | Moderately-poorly differentiated adenocarcinoma |
| Male   | MSS | Rectum            | protruded type    | Moderately differentiated adenocarcinoma        |
| Male   | MSS | Rectum            | ulcerative type   | Well-moderately differentiated adenocarcinoma   |
| Male   | MSS | Sigmoid colon     | ulcerative type   | Well-moderately differentiated adenocarcinoma   |
| Female | MSS | Rectum            | ulcerative type   | Moderately-poorly differentiated adenocarcinoma |
| Female | MSS | Sigmoid colon     | ulcerative type   | Moderately differentiated adenocarcinoma        |
| Male   | MSS | Rectum            | ulcerative type   | Mucinous carcinoma                              |

|        |     |                   |                 |                                                 |
|--------|-----|-------------------|-----------------|-------------------------------------------------|
| Male   | MSS | Sigmoid colon     | ulcerative type | Moderately differentiated adenocarcinoma        |
| Female | MSS | Right-sided colon | ulcerative type | Moderately differentiated adenocarcinoma        |
| Male   | MSS | Right-sided colon | ulcerative type | Well-moderately differentiated adenocarcinoma   |
| Female | MSS | Rectum            | protruded type  | Well-moderately differentiated adenocarcinoma   |
| Female | MSS | Rectum            | ulcerative type | Moderately-poorly differentiated adenocarcinoma |
| Male   | MSS | Right-sided colon | ulcerative type | Moderately differentiated adenocarcinoma        |
| Male   | MSS | Right-sided colon | ulcerative type | Moderately differentiated adenocarcinoma        |
| Male   | MSS | Rectum            | ulcerative type |                                                 |
| Male   | MSS | Rectum            | ulcerative type | Moderately differentiated adenocarcinoma        |
| Male   | MSS | Rectum            | ulcerative type | Well-moderately differentiated adenocarcinoma   |
| Male   | MSS | Rectum            | protruded type  | Well-moderately differentiated adenocarcinoma   |
| Male   | MSI | Right-sided colon | ulcerative type | Poorly differentiated adenocarcinoma            |
| Male   | MSI | Rectum            | protruded type  | Moderately differentiated adenocarcinoma        |
| Male   | MSI | Left-sided colon  | ulcerative type | Moderately differentiated adenocarcinoma        |
| Female | MSI | Right-sided colon | ulcerative type | Well-moderately differentiated adenocarcinoma   |
| Male   | MSI | Right-sided colon | protruded type  | Moderately-poorly differentiated adenocarcinoma |
| Male   | MSI | Right-sided colon | ulcerative type | Well-moderately differentiated adenocarcinoma   |
| Female | MSI | Sigmoid colon     | protruded type  | Moderately differentiated adenocarcinoma        |
| Female | MSI | Right-sided colon | ulcerative type | Well-moderately differentiated adenocarcinoma   |
| Male   | MSI | Right-sided colon | ulcerative type | Well-moderately differentiated adenocarcinoma   |
| Male   | MSI | Right-sided colon | protruded type  | Moderately differentiated adenocarcinoma        |
| Male   | MSI | Right-sided colon | protruded type  | Moderately-poorly differentiated adenocarcinoma |



|        |     |                   |                 |                                                 |
|--------|-----|-------------------|-----------------|-------------------------------------------------|
| Female | MSI | Right-sided colon | protruded type  | Moderately differentiated adenocarcinoma        |
| Male   | MSI | Rectum            | protruded type  | Well-moderately differentiated adenocarcinoma   |
| Male   | MSI | Right-sided colon | protruded type  | Well-moderately differentiated adenocarcinoma   |
| Male   | MSI | Right-sided colon | ulcerative type | Well-moderately differentiated adenocarcinoma   |
| Female | MSI | Sigmoid colon     | protruded type  | Well differentiated adenocarcinoma              |
| Male   | MSI | Rectum            | ulcerative type | Moderately differentiated adenocarcinoma        |
| Male   | MSI | Rectum            | ulcerative type | Moderately differentiated adenocarcinoma        |
| Female | MSI | Right-sided colon | ulcerative type | Moderately differentiated adenocarcinoma        |
| Male   | MSI | Right-sided colon | protruded type  | Moderately differentiated adenocarcinoma        |
| Male   | MSI | Right-sided colon | ulcerative type | Poorly differentiated adenocarcinoma            |
| Female | MSI | Rectum            | ulcerative type | Moderately differentiated adenocarcinoma        |
| Male   | MSI | Right-sided colon | protruded type  | Moderately-poorly differentiated adenocarcinoma |
| Male   | MSI | Transverse colon  | ulcerative type | Moderately-poorly differentiated adenocarcinoma |
| Male   | MSI | Right-sided colon | protruded type  | Moderately differentiated adenocarcinoma        |
| Male   | MSI | Right-sided colon | ulcerative type | Poorly differentiated adenocarcinoma            |
| Male   | MSI | Right-sided colon | protruded type  | Well-moderately differentiated adenocarcinoma   |
| Male   | MSI | Right-sided colon | protruded type  | Moderately-poorly differentiated adenocarcinoma |
| Male   | MSI | Right-sided colon | ulcerative type | Moderately-poorly differentiated adenocarcinoma |
| Male   | MSI | Colon             | ulcerative type | Moderately-poorly differentiated adenocarcinoma |
| Female | MSI | Left-sided colon  | protruded type  | Well-moderately differentiated adenocarcinoma   |

1665

1666

1667

1668

1669

**Supplemental Table 3**

| Gender | Patient  | Histology                                                                          |
|--------|----------|------------------------------------------------------------------------------------|
| Male   | Patient1 | Poorly differentiated sarcomatoid carcinoma                                        |
| Male   | Patient2 | Moderately differentiated squamous cell carcinoma                                  |
| Male   | Patient3 | Moderately differentiated invasive adenocarcinomas (acinar and lepidic)            |
| Female | Patient4 | Nonmucinous adenocarcinoma in situ                                                 |
| Female | Patient5 | Moderately differentiated invasive adenocarcinomas (acinar, lepidic and papillary) |
| Female | Patient6 | Moderately differentiated invasive adenocarcinomas (acinar)                        |
| Male   | Patient7 | Poorly differentiated invasive adenocarcinomas (micropapillary and solid)          |

1670

1671

1672

1673

1674

1675

1676

1677

1678

1679

1680

1681

1682

1683

**Supplemental Table 4**

|    |       |        |    |           |           |
|----|-------|--------|----|-----------|-----------|
| 1  | 89Y   | CD45   | 22 | 160Gd     | CD86      |
| 2  | 115In | CD3e   | 23 | 161Dy     | iNOS      |
| 3  | 141Pr | CD103  | 24 | 162Dy     | CD206     |
| 4  | 142Nd | MHCII  | 25 | 163Dy     | CD25      |
| 5  | 143Nd | B220   | 26 | 164Dy     | CD40      |
| 6  | 144Nd | CX3CR1 | 27 | 165Ho     | Ly6G      |
| 7  | 145Nd | CD69   | 28 | 166Er     | NEDD8     |
| 8  | 146Nd | PD1    | 29 | 167Er     | CD16/32   |
| 9  | 147Sm | CD80   | 30 | 168Er     | FoxP3     |
| 10 | 148Nd | Ly6C   | 31 | 169Tm     | SENP8     |
| 11 | 149Sm | CD64   | 32 | 170Er     | PDL1      |
| 12 | 150Nd | CD14   | 33 | 171Yb     | CD163     |
| 13 | 151Eu | NK1.1  | 34 | 172Yb     | CD127     |
| 14 | 152Sm | CD11c  | 35 | 173Yb     | CD172a    |
| 15 | 153Eu | TCRgd  | 36 | 174Yb     | CCR2      |
| 16 | 154Sm | Ki-67  | 37 | 175Lu     | Siglec F  |
| 17 | 155Gd | BST2   | 38 | 176Yb     | MERTK     |
| 18 | 156Gd | CD68   | 39 | 197Au     | CD4       |
| 19 | 157Gd | FceRIa | 40 | 198Pt     | CD8a      |
| 20 | 158Gd | CD19   | 41 | 209Bi     | CD11b     |
| 21 | 159Tb | F4/80  |    | 191/193Ir | DNA       |
|    |       |        |    | 194Pt     | Live/dead |

1685

1686

1687

1688

1689

1690

1691
